# 1 Long non-coding RNAs defining major 2 subtypes of B cell precursor acute 3 lymphoblastic leukemia

4 Alva Rani James<sup>1,2,3</sup>, Michael P Schroeder<sup>1</sup>, Martin Neumann<sup>1,2,3</sup>, Lorenz Bastian<sup>1,2,3</sup>, Cornelia Eckert<sup>2,3,4</sup>, Nicola  
5 Gökbuget<sup>2,3,5</sup>, Jutta Ortiz Tanchez<sup>1</sup>, Cornelia Schlee<sup>1</sup>, Konstandina Isaakidis<sup>1</sup>, Stefan Schwartz<sup>1</sup>, Thomas  
6 Burmeister<sup>6</sup>, Arend von Stackelberg<sup>2,3,4</sup>, Michael A Rieger<sup>2,3,5</sup>, Stefanie Göllner<sup>7</sup>, Martin Horstman<sup>8</sup>, Martin  
7 Schrappe<sup>9</sup>, Renate Kirschner-Schwabe<sup>2,3,4</sup>, Monika Brüggemann<sup>10</sup>, Carsten Müller-Tidow<sup>7</sup>, Hubert Serve<sup>2,3,5</sup>,  
8 Altuna Akalin<sup>11</sup>, Claudia D Baldus<sup>1,2,3\*</sup>

- 9
- 10 1. Charité, University Hospital Berlin, Department of Hematology and Oncology, Campus Benjamin  
11 Franklin, Berlin, 12203, Germany
  - 12 2. German Cancer Research Center (DKFZ), Heidelberg, 69120, Germany
  - 13 3. German Cancer Consortium (DKTK), Heidelberg, 69120, Germany
  - 14 4. Charité, University Hospital Berlin, Department of Pediatric Hematology/Oncology, Campus Rudolf  
15 Virchow, 13353, Berlin, Germany
  - 16 5. Goethe University Hospital, Department of Medicine II, Department of Hematology/Oncology,  
17 Frankfurt/M, 60590, Germany
  - 18 6. Charité Universitätsmedizin Berlin, Campus Virchow-Klinikum, Department. of Hematology,  
19 Oncology and Tumor Immunology, Berlin, 13353, Germany
  - 20 7. University Clinic Heidelberg, Department of Hematology, Oncology & Rheumatology, Heidelberg,  
21 69120, Germany
  - 22 8. Research Institute Children's Cancer Center, Department of Pediatric Hematology and Oncology,  
23 University Medical Center Hamburg, Hamburg, 20251, Germany
  - 24 9. University Hospital Schleswig-Holstein, Campus Kiel, Department of Pediatrics, Kiel, 24105,  
25 Germany.
  - 26 10. University Hospital Schleswig-Holstein, Campus Kiel, Department of Hematology and Oncology, Kiel,  
27 24105, Germany
  - 28 11. Bioinformatics platform, Berlin Institute for Medical Systems Biology (BIMSB), Max Delbrück Center  
29 (MDC), Berlin, 13125, Germany

30 \*Corresponding author

31 Email: [claudia.baldus@charite.de](mailto:claudia.baldus@charite.de) (CDB)

32

## 33 **Abstract**

34 Recent studies implicated that long non-coding RNAs (lncRNAs) may play a role in the  
35 progression and development of acute lymphoblastic leukemia, however, this role is not yet  
36 clear. In order to unravel the role of lncRNAs associated with B-cell precursor Acute  
37 Lymphoblastic Leukemia (BCP-ALL) subtypes, we performed transcriptome sequencing and  
38 DNA methylation array across 82 BCP-ALL samples from three molecular subtypes (DUX4,  
39 Ph-like, and Near Haploid or High Hyperdiploidy). Unsupervised clustering of BCP-ALL  
40 samples on the basis of their lncRNAs on transcriptome and DNA methylation profiles  
41 revealed robust clusters separating three molecular subtypes. Using extensive  
42 computational analysis, we developed a comprehensive catalog of 1235 aberrantly  
43 dysregulated BCP-ALL subtype-specific lncRNAs with altered expression and methylation  
44 patterns from three subtypes of BCP-ALL. By analyzing the co-expression of subtype-specific  
45 lncRNAs and protein-coding genes, we inferred key molecular processes in BCP-ALL  
46 subtypes. A strong correlation was identified between the DUX4 specific lncRNAs and  
47 activation of TGF- $\beta$  and Hippo signaling pathways. Similarly, Ph-like specific lncRNAs were  
48 correlated with genes involved in activation of PI3K-AKT, mTOR, and JAK-STAT signaling  
49 pathways. Interestingly, the relapse-specific differentially expressed lncRNAs correlated  
50 with the activation of metabolic and signaling pathways. Finally, we showed a set of  
51 epigenetically altered lncRNAs facilitating the expression of tumor genes located at their *cis*  
52 location. Overall, our study provides a comprehensive set of novel subtype and relapse-  
53 specific lncRNAs in BCP-ALL. Our findings suggest a wide range of molecular pathways are  
54 associated with lncRNAs in BCP-ALL subtypes and provide a foundation for functional  
55 investigations that could lead to new therapeutic approaches.

## 56 **Author Summary**

57 Acute lymphoblastic leukemia is a heterogeneous blood cancer, with multiple molecular  
58 subtypes, and with high relapse rate. We are far from the complete understanding of the  
59 rationale behind these subtypes and high relapse rate. Long non-coding (lncRNAs) has  
60 emerged as a novel class of RNA due to its diverse mechanism in cancer development and  
61 progression. LncRNAs does not code for proteins and represent around 70% of human  
62 transcripts. Recently, there are a number of studies used lncRNAs expression profile in the  
63 classification of various cancers subtypes and displayed their correlation with genomic,  
64 epigenetic, pathological and clinical features in diverse cancers. Therefore, lncRNAs can  
65 account for heterogeneity and has independent prognostic value in various cancer subtypes.  
66 However, lncRNAs defining the molecular subtypes of BCP-ALL are not portrayed yet. Here,  
67 we describe a set of relapse and subtype-specific lncRNAs from three major BCP-ALL  
68 subtypes and define their potential functions and epigenetic regulation. Our data uncover  
69 the diverse mechanism of action of lncRNAs in BCP-ALL subtypes defining how lncRNAs are  
70 involved in the pathogenesis of disease and the relevance in the stratification of BCP-ALL  
71 subtypes.

## 72 INTRODUCTION

73 B-cell Precursor Acute Lymphoblastic Leukemia (BCP-ALL) is the most prevalent disease in  
74 children and affects also adults. Despite improvements in treatment regimens such as  
75 chemotherapy and allogeneic hematopoietic stem cell transplantation, the prognosis  
76 remains poor for patients in high-risk groups and at relapse (1). Various risk subtypes have  
77 been established based on the cytogenetic analysis and molecular genetics studies. These  
78 subtypes are classified based on the presence of high hyperdiploidy (51-65 chromosomes)  
79 (2), hypodiploidy (less than 44 chromosomes)(3) and fusion genes (for example BCR-ABL,  
80 ETV6-RUNX, MLL, etc)(4). About 70-80% of both adults and pediatric cases of BCP-ALL  
81 constitute these subtypes, although the frequency may differ (5).

82 Recent efforts taking advantage of whole transcriptome sequencing (RNA-Seq) have refined  
83 this classification by identifying novel BCP-ALL subtypes. RNA-Seq analysis identified  
84 cytogenetically non-detectable recurrent rearrangements and gene fusions, which allowed  
85 characterization of additional subtypes based on distinct gene expression profiles (6). For  
86 example, the DUX4 (7) subtype is defined mainly by the IGH-DUX4 or ERG-DUX4 gene  
87 fusions; the Ph-like (8) subtype is a high-risk subtype with a gene expression profile similar  
88 to Ph-positive ALL; however, lacking BCR-ABL1 fusion gene; and the Near Haploid/High  
89 Hyperdiploid (NH-HeH) (51–67 chromosomes) subtype (9,10) is a common subtype,  
90 comprising 30% of all pediatric BCP-ALL. These subtypes are clinically relevant with  
91 distinct gene expression profile and have been widely studied in the recent past.  
92 Nevertheless, we are far from complete understanding of BCP-ALL subtypes and their  
93 heterogeneity and its associated molecular mechanisms, which pose a major challenge for  
94 improving diagnosis and therapy. Recent studies have suggested that long non-coding RNAs  
95 (lncRNAs) and small non-coding RNAs (e.g. microRNAs) might play a key role in

96 development and progression of leukemia (11) and thus constitute as new biomarkers and  
97 potential targets for novel therapies (12).

98 LncRNAs are arbitrarily defined as transcripts longer than 200 base pairs and lacking an  
99 extended protein-coding open reading frame (ORF). It has become apparent that lncRNAs  
100 are frequently spliced and polyadenylated and are mainly transcribed by RNA polymerase II  
101 (13). LncRNAs expression has been reported as highly tissue-specific even though the  
102 expression abundance is generally lower compared to protein-coding genes (14). The  
103 expression specificity has been extended to a wide variety of physiological and pathological  
104 mechanisms like cancer development and Pluripotency (15). LncRNAs can act either  
105 proximally (in the cis region) or distally (in the trans region) for the transcriptional  
106 regulation of protein-coding genes (16). Like proteins, various lncRNAs are attributed to  
107 oncogenic or tumor-suppressive (17) activities exerting various cellular functions (18). In  
108 addition, lncRNAs regulate gene expression at the epigenetic (19) and post-transcription  
109 (20) levels. Genome-wide association studies in cancer have disclosed that 80% of cancer-  
110 associated single-nucleotide polymorphisms (SNPs) are in non-coding regions (21),  
111 including lncRNAs, suggesting that a significant portion of the genetic etiology of cancer  
112 can be related to lncRNAs (22). Moreover, lncRNAs are reported to be useful for disease  
113 prognosis, exemplified by the lncRNA HOTAIR (HOX transcript antisense RNA), which is  
114 up-regulated in acute myeloid leukemia (AML) patients (23). So far, the majority of studies  
115 explored the role of single lncRNAs in leukemia including AML (24), chronic lymphocytic  
116 leukemia (CLL) (25) and pediatric ALL (26). Yet a comprehensive genomic and epigenetic  
117 delineation of lncRNAs deregulations in BCP-ALL subtypes, and their molecular and  
118 functional insights are lacking.

119 In the present study, we explored lncRNA landscapes in DUX4, Ph-like, and NH-HeH BCP-

120 ALL subtypes and extracted novel biological and functional insights of BCP-ALL subtype-  
121 specific lncRNAs and their epigenetic activity. On the basis of RNA-seq transcriptional and  
122 DNA methylation survey of lncRNAs, we have determined 1235 subtype-specific, relapse-  
123 specific markers and epigenetically altered lncRNAs and demonstrated their relevance in  
124 BCP-ALL subtype classification. From our in-depth analyses, we have inferred the potential  
125 functions of subtype-specific lncRNAs. Overall, this work provides a most comprehensive  
126 and integrative resource which highlights the impact of lncRNAs on relevant pathways that  
127 are dysregulated in the molecular subgroups of BCP-ALL and may provide new approaches  
128 for prognosis and treatment.

## 129 **RESULTS**

### 130 **Unique lncRNAs expression profiles characterize BCP-ALL subtypes**

131 To identify BCP-ALL subtype-specific lncRNAs, we analysed transcriptome profiles from  
132 paired initial diagnosis (ID) and relapse (REL) samples of 26 pediatric and 22 adult BCP-  
133 ALL patients lacking known chromosomal translocations like BCR-ABL. Based on DNA  
134 mutations and chromosomal translocations combined with RNA expression and DNA  
135 methylation profiles the samples were classified into different molecular subtypes (Table  
136 S1), namely DUX4 (n = 23), Ph-like (n = 21), Near Haploid or High Hyperdiploid (NH-  
137 HeH) (n = 16), and low-hypodiploid (LH) (n = 6) and others (n = 18).

138 When the distribution of lncRNAs gene expression levels across all BCP-ALL samples was  
139 compared with that of protein-coding genes, the former generally showed lower expression  
140 levels than the latter (27) (Fig S1A, Table S1). The principal component analysis (PCA) on  
141 the expression (FPKM value) of 13,860 GENCODE lncRNAs revealed three major BCP-ALL  
142 subtypes, DUX4, Ph-like and NH-HeH with a distinct separation (Fig 1A). This observation  
143 is in concordance to the predefined molecular classification. In particular, samples of the

144 DUX4 subtype showed robust separation compared to the remaining samples implying a  
145 subtype-specific lncRNAs signatures.

146 To unveil differentially expressed (DE) lncRNAs across these three major molecular  
147 subtypes, we performed DE analysis between subtypes. We obtained 1235 significant DE  
148 subtype-specific lncRNAs ( $P$ -value  $\leq 0.01$  and absolute Fold change  $\geq \pm 1.5$ ) defining  
149 signatures of three subtypes (Fig 1B, Fig S2A-C, Table S1). Of these, 24 lncRNAs were  
150 commonly detected in all 3 BCP-ALL subtypes (Fig 1C), about 523 (Hypergeometric  $P$ -value  
151 =  $9.2E-29$ ) subtype-specific lncRNAs overlapped with deregulated lncRNAs from 12 other  
152 cancer types (Fig S2D, Table S1) (28). The remaining 46% ( $n = 713$ ) of BCP-ALL subtype-  
153 specific DE lncRNAs were novel and specific to our subtypes. Out of the overlapped DE  
154 lncRNAs ( $n = 523$ ), 23 (Table S1) were cross-validated in independent cohorts from  
155 lnc2cancer (29) database and found to be enriched for oncogenic class of lncRNAs. For  
156 example, oncogenic lncRNAs *PVT1* (30) and *GAS5* (31) are differentially up-regulated in  
157 the DUX4 subgroup, and *CRNDE* (32) is DE in Ph-like subgroup. Together, subtype-specific  
158 lncRNAs signatures assigned molecular subgroups of BCP-ALL.

### 159 **Identification and inferred functions of lncRNAs associated with molecular subtypes** 160 **of BCP-ALL**

161 As lncRNAs can function by regulating protein-coding genes in *cis* and/or *trans* (33–36)  
162 regions, we performed functional enrichment analyses using guilt-by-association approach  
163 based on the correlation between neighbouring (*cis*) and distally (*trans*) located protein-  
164 coding (PC) genes (within  $\pm 100$  kb *cis* and  $> \pm 100$  kb window for *trans*) of the subtype-  
165 specific lncRNAs (see materials and methods). Expression of both *cis* and *trans* PC genes  
166 showed a higher tendency towards positive correlation with the expression of the  
167 corresponding lncRNAs (Table 1).

168 **Table 1: Number of BCP-ALL subtype-specific lncRNAs co-expressed with its *cis* and**  
169 ***trans* PC genes.**

| Subtypes | <i>Cis</i> PC genes<br>(n = 929) | <i>Cis</i> co-expressed<br>DE lncRNAs<br>(n = 62) | <i>Trans</i> PC<br>genes<br>(n = 753) | <i>Trans</i> co-expressed<br>DE lncRNAs<br>(n = 552) |
|----------|----------------------------------|---------------------------------------------------|---------------------------------------|------------------------------------------------------|
| Ph-like  | 260                              | 170 (383)                                         | 261                                   | 173 (383)                                            |
| DUX4     | 669                              | 451 (736)                                         | 492                                   | 379 (736)                                            |

170 The table represents the number of DE lncRNAs showed *cis* ( $\leq 100$  Kb proximity)  
171 and *trans* ( $\geq 100$  Kb) protein coding genes and the number of DE lncRNAs co-  
172 expressed with them. The numbers shown within the bracket is the total number of  
173 DE lncRNAs corresponding to the respective subtypes.

174 Significantly co-expressed (Pearson correlation coefficient  $\geq 0.55$ , 2-tailed *P*-value  $\leq$   
175 0.05) *cis* and *trans* protein-coding genes associated with DUX4 (n = 58 in *cis* and n = 127  
176 in *trans*) and Ph-like (n = 24 in *cis* and n = 20 in *trans*) specific DE lncRNAs demonstrated  
177 activation of key signalling pathways involved in proliferation, apoptosis, and  
178 differentiation in leukemia (Table S2). For example, in the *cis* based analysis, we identified  
179 a strong correlation between DUX4 specific lncRNAs and genes involved in the TGF-beta,  
180 Hippo, and P53 signalling pathways (Fig 2A, Table S2). Whereas, the Ph-like specific  
181 lncRNAs were correlated with genes involved in JAK-STAT, mTOR, and PIK3-AKT signalling  
182 pathways (Fig 2B, Table S2). The *trans* based analysis revealed same vital signalling  
183 pathways in DUX4 subtype (Fig S3A-B, Table S2), whereas in Ph-like subtype we identified  
184 additional signalling pathways, including, P53 and mitogen-activated protein kinase  
185 (MAPK) pathways (Fig S3C, Table S2). The strongly co-expressed *cis* PC genes with DE  
186 lncRNAs (n = 32) includes oncogenes including, *IL2RA* (37), *TGFB2* (38), and *CDK6* (39)  
187 activated in signalling pathways from DUX4 and Ph-like subgroups (Fig S4A-D, Table 2-3).

188



189 **Table 2. Subtype-specific lncRNAs and oncogenes.**

| Subtype-specific lncRNAs | Pearson correlation coefficient | P-value   | Oncogene |
|--------------------------|---------------------------------|-----------|----------|
| RP11-347C18.3            | 0.56                            | 3.25E-008 | CDK6     |
| RP11-461F16.3            | 0.62                            | 5.21E-010 |          |
| RP11-96H19.1             | 0.62                            | 3.89E-010 |          |
| RP11-228B15.4            | 0.64                            | 7.68E-011 |          |
| MME-AS1                  | 0.56                            | 3.68E-008 |          |
| CTB-39G8.3               | 0.57                            | 1.78E-008 |          |
| AC002454.1               | 0.72                            | 2.21E-014 |          |
| RP11-582J16.4            | 0.55                            | 8.08E-008 |          |
| AC009970.1               | 0.64                            | 6.23E-011 |          |
| RP11-229P13.20           | 0.66                            | 1.44E-011 |          |
| LINC00114                | 0.57                            | 3.06E-008 |          |
| CTB-118N6.3              | 0.61                            | 9.70E-010 |          |
| SOCS2-AS1                | 0.62                            | 4.94E-010 |          |
| CTD-2561B21.10           | 0.61                            | 9.91E-010 |          |
| RP11-413E1.4             | 0.56                            | 4.36E-008 |          |
| KB-1460A1.1              | 0.55                            | 7.77E-008 |          |
| AC012309.5               | 0.59                            | 4.10E-009 |          |
| RP11-37B2.1              | 0.59                            | 4.76E-009 |          |
| ASB16-AS1                | 0.65                            | 3.86E-011 |          |
| LINC00426                | 0.62                            | 6.32E-010 |          |
| LINC01071                | 0.57                            | 2.46E-008 |          |
| RP11-536K7.5             | 0.74                            | 5.11E-15  | IL2RA    |
| RP11-224O19.2            | 0.98                            | 1.08E-061 | TGFB2    |
| AC004837.5               | 0.83                            | 6.11E-023 |          |
| RP11-251M1.1             | 0.79                            | 7.39E-019 |          |
| CTD-2571L23.8            | 0.75                            | 2.94E-016 |          |
| RP11-35O15.1             | 0.65                            | 3.36E-011 |          |
| AC139100.3               | 0.58                            | 1.00E-008 |          |
| RP11-158M2.3             | 0.58                            | 1.50E-008 |          |
| RP11-672A2.5             | 0.56                            | 4.68E-008 |          |
| CTD-2357A8.3             | 0.55                            | 7.46E-008 |          |
| RP11-677M14.3            | 0.55                            | 6.68E-008 |          |

190 Positively correlating novel *cis* subtype-specific lncRNAs with oncogenes, *CDK6*, *TGFB2*,  
 191 and *IL2RA* from Ph-like and DUX4 subtypes.

192 **Table 3: Subtype-specific novel DE lncRNAs co-expressed with oncogenes, which are**  
 193 **associated with vital molecular pathways.**

| Subtype-specific lncRNAs | Cis PC | Pearson correlation coefficient | Associated pathways                  |
|--------------------------|--------|---------------------------------|--------------------------------------|
| RP11-224O19.2            | TGFB2  | 0.98                            | Hippo<br>TGF- $\beta$<br>Endocytosis |
| AC004837.5               |        | 0.83                            |                                      |
| RP11-251M1.1             |        | 0.79                            |                                      |
| CTD-2571L23.8            |        | 0.75                            |                                      |

|                                |       |              |                                                                            |
|--------------------------------|-------|--------------|----------------------------------------------------------------------------|
| AC093818.1<br>AC078883.3       | ITGA6 | 0.95<br>0.68 | PI3K-Akt                                                                   |
| U62631.5                       | CD22  | 0.78         | Cell adhesion molecules (CAMs)<br>B cell receptor signaling pathway        |
| CTD-2267D19.2<br>RP11-486L19.2 | RARA  | 0.89<br>0.70 | Pathways in cancer<br>Transcriptional mis-regulation in<br>cancer pathways |

194 The table represents the novel subtype specific DE lncRNAs co-expressed with its *cis*  
195 genes such as *TGFB2*, *ITGA6*, *CD22*, and *RARA* genes, which were enriched in vital  
196 molecular pathways in BCP-ALL.

197 However, there were no significant pathways identified within NH-HeH subtype. The  
198 subtype-specific *cis* and *trans* acting lncRNAs which are up-regulated and correlated with  
199 genes involved in signalling pathways from DUX4 and Ph-like subtypes were hinting their  
200 gene expression regulatory activity.

201 We next related the functions of DUX4 and Ph-like specific DE lncRNAs obtained from *cis*  
202 based analysis to those functions identified with DE PC genes. We observed an overlap of  
203 100% (n = 18, Table S2) of pathways from the DUX4 subtype between lncRNAs based and  
204 PC based functional enrichment analysis (Fig 2C). Whereas, in Ph-like subtype, we  
205 identified 60% (9 out of 15) same pathways between DE PC based and DE lncRNAs based  
206 functional enrichment analysis (Table S2 and Fig 2D). However, we identified Ph-like  
207 specific lncRNAs to be more strongly correlated with genes involved in key signalling  
208 pathways than Ph-like specific protein-coding genes. For example, we identified mTOR and  
209 PI3K-AKT exclusively in the Ph-like specific lncRNAs based analysis. Together, our analyses  
210 highlight important functions of BCP-ALL subtype-specific lncRNAs whose expression  
211 correlates tightly with that of cancer-related oncogenes.

### 212 **Relapse-specific lncRNAs driving BCP-ALL progression**

213 To gain insights into the possible role of lncRNAs driving BCP-ALL progression, we  
214 investigated dysregulation of lncRNAs at relapse. For each molecular BCP-ALL subtype, we

216 performed a differential expression analysis of lncRNAs between ID and REL samples (Fig  
217 3). 947 lncRNAs (Table S3) emerged as significantly DE (absolute Fold change  $\geq +1.5$ ;  
218  $P$ -value  $\leq 0.01$ ) between ID and REL from the three subtypes. Around 20% ( $n = 186$ ) of  
219 those DE lncRNAs were up-regulated and 80% were down-regulated at relapse. The  
220 hierarchical clustering on relapse-specific lncRNAs within each subtype (DUX4, Ph-like, NH-  
221 HeH) identified clear separation between ID and REL (Fig 3A-C). We observed 19% (183)  
222 relapse-specific lncRNAs identified here overlapped with subtype-specific lncRNAs (Fig 3E).  
223 The putative molecular functions of relapse-specific lncRNAs were identified using the  
224 previously mentioned guilt-by-association approach. Relapse-specific lncRNAs within Ph-  
225 like and NH-HeH subtypes did not show any significant correlation with activation of  
226 pathways. In contrast, in the DUX4 subtype, we identified 56% ( $n = 321$ ) relapse-specific  
227 lncRNAs correlated with *cis* PC genes (Table S3). These strongly correlated relapse-specific  
228 lncRNAs showed activation of PC genes involved in vital signalling pathways and metabolic  
229 pathways, including NF-kappa B-signalling pathway, cell adhesions molecule (CAM5) and  
230 metabolic pathways (number of genes involved  $\geq 3$  and  $P$ -value  $\leq 0.05$ ) (Fig 3D, Table  
231 S3). These results indicate that relapse-specific markers from DUX4 subtype may be  
232 functionally engaged in metabolic and signalling pathways.

### 233 **Subtype specific BCP-ALL lncRNAs show epigenetic alterations**

234 For the analysis of the methylation status of loci located at the lncRNAs genomic position in  
235 the BCP-ALL subtypes, we used DNA methylation array data (collected from Illumina 450k  
236 methylation array) from the same patients ( $n = 46$ ) including matched diagnosis (ID) and  
237 relapse (REL) samples ( $n = 82$ ). The distribution of DNA methylation levels of CpG sites ( $n$   
238 = 60,021, Table S4) associated with 7,160 lncRNAs was compared with CpG sites  
239 associated with PC genes across all BCP-ALL samples. Unlike the expression levels, the

240 distribution of DNA methylation (hypo-methylation or hyper-methylation) between  
241 lncRNAs and PC genes were similar (Fig S1B). Given the robust separation of BCP-ALL  
242 subtypes on DNA methylation profile of CpGs associated with lncRNAs on the PCA analysis  
243 (Fig 4A), we next studied the differential hypo-methylated (methylation difference value <  
244 0;  $P$ -value  $\leq 0.05$ ) and hyper-methylated (methylation difference value > 0.2;  $P$ -value  
245  $\leq 0.05$ ) CpGs associated with lncRNAs in each subtype (see materials and method). The  
246 hierarchical clustering of differentially methylated (DM) lncRNAs showed distinct  
247 methylation patterns of each subtype, concordant with the DE lncRNAs signature (Fig 4B-D,  
248 Table S4). In the DUX4 and NH-HeH subtypes the number of hypo-methylated lncRNAs  
249 (differential methylation value < 0,  $P$ -value  $\leq 0.05$ ) were higher compared to the  
250 number of hyper-methylated lncRNAs. We classified the DM lncRNAs based on their  
251 genomic regions as gene body methylated and promoter-TSS methylated. In the promoter  
252 methylated lncRNAs we identified the same trend with high degree of hypo-methylated and  
253 lower number hyper-methylated lncRNAs in DUX4 and NH-HeH subtypes. However, the Ph-  
254 like subtype has shown a higher degree of hyper-methylated DM lncRNAs than hypo-  
255 methylated DM lncRNAs. The list of subtype-specific DM lncRNAs from three subtypes  
256 contained previously defined epigenetically altered lncRNAs from other cancer types, for  
257 example, we observed the oncogenic lncRNAs *LINC00312* (40), *PVT1*, and *TCL6* (41),  
258 which are differentially methylated in at least one of the three subtypes. Together, this data  
259 illustrates that epigenetically altered lncRNAs within three BCP-ALL subtypes.

## 260 **Correlation between differentially expressed and differentially methylated lncRNAs**

261 In order to define whether the subtype-specific promoter methylation impacts on the  
262 expression level, we compared the promoter-TSS differential CpG methylated lncRNAs ( $n =$   
263 227) with its differential expression signature. We observed 44 lncRNAs with differential

264 methylation pattern in their promoter region with differential expression pattern at RNA  
 265 level. Out these, lncRNAs harboring significant hypo-methylation and hyper-methylation  
 266 pattern (Pearson correlation, 2-tailed  $P$ -value  $\leq 0.05$ ) at the promoter region accounted  
 267 for 23 (Table 4) lncRNAs across the three BCP-ALL subtypes.

268 **Table 4: The list of significantly correlated DNA methylation and expression for**  
 269 **promoter methylated lncRNAs (n = 23) from BCP-ALL subtypes.**

| DM lncRNAs    | Pearson correlation coefficient | P-value   | Methylation | Absolute Fold change | Subtypes |
|---------------|---------------------------------|-----------|-------------|----------------------|----------|
| AC003075.4    | -0.31                           | 0.004     | 1.43        | -1.26                | DUX4     |
| AC099754.1    | -0.32                           | 0.002     | -1.74       | 3.2                  |          |
| AC104655.3    | -0.26                           | 0.017     | -2.27       | 2.07                 |          |
| CACNA1C-AS1   | -0.45                           | 2.03E-05  | 1.97        | -1.62                |          |
| CTB-25B13.9   | -0.26                           | 0.016     | -1.73       | 1.46                 |          |
| IGF2-AS       | -0.24                           | 0.028     | -1.33       | 4.95                 |          |
| LINC01006     | -0.39                           | 0.001     | -2.06       | 2.53                 |          |
| PVT1          | -0.40                           | 0.001     | -2.13       | 1.15                 |          |
| RGMB-AS1      | -0.26                           | 0.0193    | -1.48       | 5.96                 |          |
| RP11-125B21.2 | -0.35                           | 0.001     | -1.75       | 4.11                 |          |
| RP11-138M12.1 | -0.70                           | 5.21E-13  | -5.98       | 3.77                 |          |
| RP11-367G6.3  | -0.30                           | 0.004     | 1.98        | -1.63                |          |
| RP11-624M8.1  | -0.50                           | 1.34E-06  | -3.34       | 4.13                 |          |
| RP11-789C17.3 | -0.36                           | 0.001     | -2.27       | 3.2                  |          |
| SERTAD4-AS1   | -0.25                           | 0.0232    | -1.98       | 1.79                 | Ph-like  |
| LINC01006     | -0.38                           | 0.0003    | 1.44        | -1.56                |          |
| RP11-138M12.1 | -0.70                           | 5.21E-13  | 2.06        | -1.44                |          |
| RP11-305F18.1 | -0.64                           | 5.36E-11  | 1.76        | -2.08                |          |
| AC099754.1    | -0.33                           | 0.002     | 1.21        | -1.36                |          |
| ACVR2B-AS1    | -0.36                           | 0.0009    | 2.18        | -1.75                |          |
| LINC00996     | -0.39                           | 0.0003    | -1.56       | 2.11                 |          |
| ERICH1-AS1    | -0.40                           | 0.0006    | -1.82       | 2.21                 | NH-HeH   |
| DIO3OS        | -0.31                           | 0.0037    | -1.76       | 4.05                 |          |
| U3            | -0.83                           | 1.346E-22 | -2.01       | 2.43                 |          |

270 The lncRNAs are promoter differentially methylated and differentially expressed in their

271 corresponding subtypes. DM: Differentially methylated. The significance is calculated  
272 based on Pearson correlation rate and two -tailed  $P$ -value  $\leq 0.05$ .

273 Of these 23 putative epigenetically facilitated lncRNAs, 15 were related to the DUX4  
274 subgroup (Fig 5A) including the novel lncRNAs, *R11-138M12.1* and *RP11-624M8.1*. These  
275 were significantly hypo-methylated at their promoter region and transcriptionally up-  
276 regulated in the DUX4 subgroup (Pearson correlation coefficient = -0.69;  $P$ -value = 5.1E-  
277 13 for *R11-138M12.1*; Pearson correlation coefficient = -0.50;  $P$ -value = 1.36E-06 for  
278 *RP11-624M8.1*; Fig 5B and 5C). In the Ph-like subtype, we observed 7 lncRNAs with  
279 promoter methylation (Fig 5D); interestingly, the same lncRNA *R11-138M12.1* showed  
280 significant hypermethylation at the promoter region and a concordant down-regulation in  
281 the Ph-like subgroup (Fig 5E). Besides these novel lncRNAs, we identified lncRNAs  
282 previously reported in the context of different cancers from our epigenetically altered  
283 results. The lncRNAs *PVT1* (Pearson correlation coefficient = -0.40, 2-tailed  $P$ -value  $\leq$   
284 0.001), and *DIO3OS* (42) (Pearson correlation coefficient = -0.31, 2-tailed  $P$ -value =  
285 0.0037) are examples, which we observed in the DUX4 and NH-HeH subtype with  
286 significant anti-correlation (2-tailed  $P$ -value  $\leq 0.01$ ) to its expression level. Around 46%  
287 ( $n = 512$ ) of DM subtype-specific lncRNAs are localized in the intronic and intergenic  
288 genomic regions. We next aimed to investigate whether these lncRNAs regions has  
289 chromatin markers encoded within their genomic location. Recent human genome-wide  
290 chromatin marker study (43) has provided us with a rich resource to identify chromatin  
291 markers. Genome-wide mapping of B-lymphocyte cell line by searching for epigenetic  
292 markers within our DM subtype-specific intronic and intergenic regions revealed a  
293 significant number of lncRNAs ( $n=53$ ) (Table S4, Fisher exact test  $P$ -value = 2.2E-16)  
294 with enhancer and insulator markers (Table S4). Out of these, lncRNAs, *RP11-134O21.1*,

295 *RP11-398B16.2*, *RP11-689B22.2*, *CTC-458I2.2* and *LINC00880* were DE expressed, with a  
 296 significant negative correlation between DNA methylation and expression levels in the  
 297 DUX4 subtype (Table 5) .

298 **Table 5: The list of significantly correlated DNA methylation and expression for**  
 299 **intronic and Intergenic methylated lncRNAs (n = 5) from DUX4 BCP-ALL subtypes.**

| DM lncRNAs    | Absolute Fold change | Methylation value | Pearson correlation rate | P-value  | Epi-markers | Biotype    |
|---------------|----------------------|-------------------|--------------------------|----------|-------------|------------|
| RP11-134O21.1 | 2.54                 | -1.56             | -0.63                    | 1.9E-010 | Enhancer    | Intron     |
| RP11-398B16.2 | 2.08                 | -1.85             | -0.47                    | 0.0007   | Insulator   |            |
| RP11-689B22.2 | 1.52                 | -3.37             | -0.47                    | 0.008    | Enhancer    |            |
| CTC-458I2.2   | -1.16                | 3.38              | -0.42                    | 0.0001   | Enhancer    |            |
| LINC00880     | -1.45                | 2.23              | -0.25                    | 0.02     | Enhancer    | Intergenic |

300 The significance is calculated based on Pearson correlation rate and two -tailed *P*-value  
 301  $\leq 0.05$ . The lncRNAs are promoter differentially methylated and differentially  
 302 expressed in their corresponding subtypes. These lncRNAs are with enhancer and  
 303 insulator epigenetic markers. DM: Differentially methylated.

304 These findings suggest that epigenetic silencing and activation of promoter lncRNAs may be  
 305 a mechanism that contributes to the dysregulation of expression of lncRNAs. In addition to  
 306 that, both intronic and intergenic DM lncRNAs associated with strong enhancer and  
 307 insulator regions can accelerate its expression at the epigenetic level.

308 **Epigenetic alterations of subtype-specific lncRNAs are associated with elevated**  
 309 **expression of tumor genes located at their *cis* region**

310 We next investigated the relationship between the epigenetic alterations of DM subtype-  
 311 specific lncRNAs (n = 1118) and the aberrant expressions of their *cis* PC genes. We found

312 78 protein-coding genes located in their *cis* region, out of these 33 protein-coding genes  
 313 have shown a significant up-regulated and down-regulated expression pattern in their  
 314 corresponding subtypes (Table 6).

315 **Table 6: The list of DNA methylated lncRNAs and differentially up and down-**  
 316 **regulated *cis* PC genes from three subtypes.**

| Subtype-specific Methylated lncRNAs | DNA methylation | Cis PC          | Absolute Fold change | Subtype |
|-------------------------------------|-----------------|-----------------|----------------------|---------|
| CTD-2231H16.1                       | -1.6803385981   | <b>PLEKHG4B</b> | 2.4840131576         | DUX4    |
| RP11-80H8.4                         | -4.8712973818   | <b>CHST2</b>    | 5.021248353          |         |
| IGF2-AS                             | -1.5149692084   | <b>IGF2</b>     | 6.7074586227         |         |
| RP11-332H18.4                       | 1.7840373497    | <b>TBX2</b>     | 5.6459057649         |         |
| RP11-332H18.4                       | 1.7840373497    | TBX4            | 1.5056957579         |         |
| RP11-624M8.1                        | -3.3400278742   | HEY2            | 3.5653881965         |         |
| CTB-25B13.9                         | -1.7341024339   | REEP6           | 1.0135168425         |         |
| RGMB-AS1                            | -1.4711332705   | <b>RGMB</b>     | 4.4287098777         |         |
| AC073316.1                          | -2.1346425435   | <b>SDK1</b>     | 4.2539854375         |         |
| CTB-35F21.2                         | -3.3996007483   | CXXC5           | 1.5322350503         |         |
| CTB-35F21.2                         | -3.5262894443   | PSD2            | 2.0348265047         |         |
| AC099754.1                          | -1.7432607805   | LRRC3B          | 3.2956570803         |         |
| AC078883.4                          | -3.4089445499   | CORO1C          | 0.797282079          |         |
| AC078883.4                          | -3.4089445499   | <b>ITGA6</b>    | 3.2489394471         |         |
| RP11-314O13.1                       | -1.5432811428   | CDYL2           | 1.7070802978         |         |
| RP3-455J7.4                         | -3.0695619042   | CREG1           | 1.5618184051         |         |
| RP11-125B21.2                       | -1.749750681    | VLDLR           | 4.2858349208         |         |
| RP11-676J12.8                       | -1.8927665898   | GLOD4           | 0.6471353534         |         |
| LINC00114                           | 3.4320004844    | ETS2            | -0.7176247124        |         |
| RP11-367G6.3                        | 1.9798401851    | THBS4           | -1.5796823436        |         |
| CTC-458I2.2                         | 3.3822300323    | CTGF            | -1.892559675         |         |
| RP11-69I8.3                         | 2.355315514     | AHR             | -2.4815111685        |         |
| RP11-293A21.1                       | -3.6963992484   | STIM2           | 2.487452138          |         |
| LINC00114                           | -2.9731205546   | ETS2            | 0.9908037963         | Ph-like |
| ACVR2B-AS1                          | 2.3094716973    | ACVR2B          | -2.4697071313        |         |
| AGAP1-IT1                           | 2.0926102582    | AGAP1           | -2.9857451706        |         |
| RP11-69I8.3                         | -3.1689478827   | CTGF            | 1.8492946882         |         |
| LINC00996                           | -1.553999019    | GIMAP8          | 1.4145369937         |         |
| AC099754.1                          | 1.2121139088    | LRRC3B          | -2.0406367867        |         |



|              |               |         |               |  |
|--------------|---------------|---------|---------------|--|
| CTB-79E8.2   | -2.2285747372 | NEURL1B | 1.1469246971  |  |
| AL133493.2   | 2.0838061516  | PCBP3   | -3.0795988736 |  |
| RP11-420G6.4 | -2.4300037457 | SERPIN1 | 0.5848645847  |  |

317 The table represents hypo-methylated and hyper methylated lncRNAs from three  
318 subtypes elevating and diminishing the expression of the protein-coding genes localized  
319 at their cis regions. The PC genes differentially up and down regulated in the respective  
320 subtypes include tumor genes as well. The highlighted rows are some examples of  
321 oncogenes with up-regulated expression profile within DUX4 subtype.

322 Intriguingly, the up-regulated PC genes include known tumor genes from various cancer  
323 types. For example, *IGF2* (44) (absolute fold change = 6.70, *adj.P-value* = 0.0061), *CTGF*  
324 (45) (absolute fold change = 1.85, *adj.P-value* = 0.02) and *ETS2* (46) (absolute fold  
325 change = 0.99, *adj.P-value* = 0.01) from DUX4, Ph-like and NH-HeH subtypes respectively  
326 (Fig 6 A-C). Together, this illustrates a set of lncRNAs which are capable of epigenetically  
327 elevating and silencing the expression profile of tumor genes localized in its *cis* region in  
328 BCP-ALL subtypes.

## 329 DISCUSSION

330 Although previous studies have demonstrated the involvement of lncRNAs in acute  
331 leukemias (25,26) comprehensive characterization of the transcriptome, epigenetic  
332 regulation and functional contribution of lncRNAs in distinct BCP-ALL subtypes are lacking.  
333 lncRNAs, as the novel class of functional molecules involved in cancer biology, is defined in  
334 the stratification of different molecular subtypes in various cancers (47–49). However, their  
335 role in BCP-ALL subtypes has not been investigated. Here, we unravel the lncRNAs  
336 landscape using transcriptome and methylome data from 46 (adult and pediatric) relapsed  
337 BCP-ALL patients focusing on the three molecular subtypes namely, DUX4, Ph-like, and NH-  
338 HeH. Our integrated transcriptomic analyses using RNA-seq and DNA methylation brings

339 significant insights and advances over other studies: it provides the most comprehensive  
340 novel datasets so far for BCP-ALL subtypes, a resource of subtype-specific and relapse-  
341 specific lncRNAs, potential lncRNAs functions and uncovers their epigenetic alterations of  
342 the BCP-ALL subtypes. We identified 1235 DE subtype-specific lncRNAs dysregulated in at  
343 least one of the three subtypes. Compared to the pan-cancer comprehensive set of  
344 aberrantly expressed lncRNAs we found 66% (712 out of 1564) of our DE lncRNAs were  
345 more specific for our subtypes introducing novel insight in the non-protein-coding part of  
346 the genome in BCP-ALL subtypes.

347 Another important aspect of our study is the identification of relapse-specific dysregulated  
348 lncRNAs across three BCP-ALL subtypes. A closer look into the relapse-specific lncRNAs  
349 signature identified lncRNAs previously described as oncogenic: lncRNAs including, *RP11-*  
350 *701P16.5* (50), *SLC38A3* (51), and *LINC00312* (40), which are up-regulated in relapsed  
351 samples within DUX4 subtype (Table 7).

352 **Table 7: Previously reported lncRNAs identified as relapse-specific lncRNAs in BCP-**  
353 **ALL subtypes.**

| Relapse-specific lncRNAs                | Disease association                                                                    |
|-----------------------------------------|----------------------------------------------------------------------------------------|
| TCL6<br>(DUX4)                          | Chromosomal translocations T-cell leukaemia/lymphoma (2)                               |
| LINC00312<br>(DUX4, Ph-like, NH-HeH)    | Proliferation, invasion, and migration of thyroid cancer, Nasopharyngeal carcinoma (3) |
| miR-17-92a-1<br>(DUX4, Ph-like, NH-HeH) | Development, progression, and aggressiveness of colorectal cancer (4)                  |

354 The differentially expressed lncRNAs between relapse (REL) and initial diagnosis  
355 (ID), from three subtypes, which were previously reported for its disease association,  
356 selected representative examples from relapse-specific lncRNAs, which are previously  
357 identified in other diseases.

358 Importantly, apoptosis suppressor lncRNA in myc-driven lymphomas (52) *miR-17/92*  
359 cluster host gene (*MIR17HG*) is up-regulated in relapse samples within the Ph-like subtype  
360 and down regulated in relapsed samples within DUX4 and NH-HeH subtypes. Overall, the  
361 relapse-specific lncRNAs highlights the oncogenic relevance in BCP-ALL subtypes.

362 Besides the oncogenic properties, lncRNAs can act as prognostic markers (53) and aid for  
363 disease diagnosis and treatment. A subset of our relapse-specific lncRNAs (n = 61, Table  
364 S3) is recently identified as prognostic markers in 14 Pan-Cancer data (36) types, including  
365 Lung Cancer Associated Transcript 1 (*LUCAT1*), which is previously reported for its drug  
366 resistance in solid cancer (54). Within the DUX4 subtype, we identified up-regulated  
367 expression of *LUCAT1* at relapse, potentially providing a novel insight into treatment  
368 resistance for BCP-ALL subtypes. Together, this illustrates the catalog of relevant lncRNAs  
369 in different subtypes of BCP-ALL as subtype-specific and relapse-specific markers with the  
370 potential of RNA based treatments in the treatment of BCP-ALL subtypes.

371 The dissection of the regulatory pathways mediated by the molecular subtype-specific and  
372 relapse-specific lncRNAs revealed the activation of pivotal signalling pathways across three  
373 BCP-ALL subtypes. The functional analysis using guilt-by-association approach highlights  
374 the subtype-specific and relapse-specific lncRNAs associated with activation of signaling  
375 pathways and metabolic pathways that are associated with leukemogenesis including TGF-  
376 Beta, hippo, P53, and JAK-STAT, cytokine-cytokine receptor, endocytosis, mTOR and  
377 metabolic pathways. Characterization of the lncRNAs involved in this pathway may  
378 potentially reveal novel targets in molecular therapies.

379 The functional insights of relapse-specific and subtype-specific lncRNAs revealed biological  
380 relevance to BCP-ALL subtypes including cell cycle functions, signal transduction, cell  
381 migration and metabolic processes. Some of the functions predicted here corroborate

382 previous studies emphasizing the strengths of the employed guilt-by-association. For  
383 example, lncRNA *AC002454.1*, which we associated to the PIK3-AKT pathway in Ph-like  
384 subtype, was recently reported to regulate cyclin-dependent kinase (*CDK6*) to participate in  
385 cell cycle disorder (55). The *CDK6* gene appears to be frequently dysregulated in  
386 hematopoietic malignancies (39) and is hence attributed a critical role in tumorigenesis,  
387 also shown in ALL driven by mixed lineage leukemia fusion proteins (56). In Ph-like  
388 subtype, both *CDK6* and *AC002454.1* are correlated and up-regulated specifically in Ph-like  
389 samples, suggesting they displayed enhancer-like functions. We identified 8 relapse-specific  
390 lncRNAs (Table S3) associated with metabolic pathways in the DUX4 subtype overlapping  
391 with lncRNAs reported (57) to synergistically dysregulate metabolic pathways in multiple  
392 tumour context.

393 Besides known lncRNAs, we also identified novel lncRNAs associated with activation of key  
394 signalling pathways. For instance, in DUX4 subtype, we identified a set of novel lncRNAs  
395 associated with TGF-beta pathway, including the antisense *RP11-224019.2*, with a  
396 significant positive correlation to the *TGFB* gene. Recently, there are a number of lncRNAs  
397 documented to be associated with TGF $\beta$  signalling pathway, including *MEG3* regulating the  
398 *TGFB2* pathway in breast cancer (58). However, lncRNAs associated with the TGF $\beta$   
399 pathway in BCP-ALL subtypes have not been reported. The co-expression of *RP11-224019.2*  
400 and *TGFB* in DUX4 subtype may indicate their functional relatedness or regulatory  
401 relationships. In addition to that, a notable observation was a strong correlation between  
402 relapse-specific lncRNAs with genes involved in the activation of metabolic pathways in the  
403 DUX4 subtype. We identified 112 relapse-specific lncRNAs co-expressed with 29 (Table S3)  
404 PC genes activated in metabolic pathways, including previously reported 8 biomarker  
405 lncRNAs. For example, we identified oncogenic lncRNA *LUCAT1* reported to be associated

406 with poor prognosis in lung cancer (54). However, the *LUCAT1* has not yet been reported in  
407 the BCP-ALL context. The global co-expression analysis and gene-expression profiling  
408 suggest important and previously unappreciated roles of lncRNAs in the BCP-ALL subtypes.  
409 Our analyses provide important functions of subtype-specific and relapse-specific lncRNA  
410 genes whose expression correlates tightly with oncogenic coding genes.  
411 Although we observed that subtype-specific lncRNAs and subtype-specific protein-coding  
412 genes were predicted to activate or inhibit the same pathways, some important exclusivity  
413 was observed. For instance, the signalling pathways such as the PI3K and mTOR in Ph-like  
414 subtype was enriched only in the lncRNAs based enrichment analysis, whereas these  
415 pathways did not appear to be enriched/dysregulated in the mRNA based analysis. The  
416 PI3K and mTOR signalling pathways control proliferation, differentiation, and survival of  
417 hematopoietic cells (59). Consistent with our studies, other studies indicated the potency of  
418 lncRNAs facilitating the cancer cell growth through mTOR and PI3K signalling pathways  
419 (36,47,60) yet reports on BCP-ALL subtypes are lacking. Considering the functional nexus  
420 between Ph-like specific lncRNAs and the activation of pathways such as mTOR and PI3K  
421 signalling pathways, targeting those lncRNAs may be a promising novel therapeutic target  
422 for BCP-ALL subtypes.  
423 Our work additionally underscores the importance of epigenetic alterations in modulating  
424 lncRNAs transcriptional activities. Although previous studies (16, 57) have demonstrated  
425 cross-talk between DNA methylation and transcriptional activities of lncRNAs, their role in  
426 the etiology of BCP-ALL subtypes has not been investigated. DNA methylation analyses of  
427 lncRNAs revealed that DNA methylation might underlie the differential expression of BCP-  
428 ALL subtype-specific lncRNAs. Subtype-specific lncRNAs identified here have been reported  
429 by previous studies. For example, *SOX2-OT* (62), *LINC00312* (63), *TCL6* and *PVT1*, are

430 onco-lncRNAs, which are promoter methylated in one of the three subtypes. The lncRNA,  
431 *PVT1* was reported for its MYC activity (64,65) and as oncogenic lncRNA with multiple  
432 roles in cell growth, dysfunction, and differentiation in AML (66). Both lncRNAs,  
433 *LINC00312* and *TCL6* have been extensively investigated on expression levels but not on the  
434 epigenetic level. The promoters of both *TCL6* and *LINC00312* were observed to be hyper-  
435 methylated with corresponding diminished expression in the DUX4 and NH-HeH samples.  
436 Notably, the DNA methylation analysis of lncRNAs revealed that DNA methylation might  
437 underlie the differential expression of subtype-specific lncRNAs. Our analysis identified 23  
438 subtype-specific lncRNAs showing hypo-methylation and hyper-methylation pattern at their  
439 promoter region that are significantly correlated with their diminished and increased  
440 expression in respective subtypes. In addition to that, we have identified 33 epigenetically  
441 co-regulated oncogenes localized in the *cis* regions of hypo-methylated and hyper-  
442 methylated lncRNAs from three subtypes. Interestingly, the oncogene associated with  
443 leukemia, *IGF2* (44) has shown an elevated expression level in Ph-like subtypes  
444 corresponding to the hypo-methylation of its antisense, *IGF2-AS1*. These findings suggest  
445 that epigenetic silencing of lncRNAs genes may be a mechanism that contributes to the  
446 dysregulation of expression of lncRNAs and their *cis* genes in BCP-ALL subtypes.  
447 Overall, our study provides an in-depth analysis of the lncRNA transcriptome and  
448 epigenome in BCP-ALL subtypes and provides numerous new lncRNAs markers associated  
449 with subtype and relapse-specificity and with epigenetic alterations in BCP-ALL subtypes.  
450 Additionally, we also demonstrated these lncRNAs might contribute to the regulation of key  
451 signalling pathways involved in BCP-ALL. In summary, our study provides a comprehensive  
452 set of dysregulated lncRNAs from BCP-ALL subtypes derived using different integrative  
453 approaches. This can serve as a major resource of BCP-ALL subtype-specific lncRNAs and

454 their mechanisms of action in detail that might pave the way for the future studies to  
455 investigate key biomarkers and potential therapeutic targets in BCP-ALL subtypes.

## 456 **Materials and Methods**

### 457 **Patient samples**

458 Patients (n = 46) used in this project were negatively selected for fusion genes detectable  
459 by routine diagnostic workup (BCR-ABL, MLL translocations, ETV6-RUNX1) from 26  
460 pediatric and 22 adult patients. From these patients we collected 44 samples at initial  
461 diagnosis (ID) and 44 samples with relapse (REL). All patients were treated in population-  
462 based German study trials (GMALL for adult and BFM for pediatric patients). A written  
463 informed consent to participate in these trials according to the Declaration of Helsinki was  
464 obtained from all patients. The studies were approved by the ethics board of Charité,  
465 Berlin.

### 466 **Overview of RNA-seq and DNA methylation array data**

467 To generate transcriptome profiles of patient samples, mRNA was isolated by using Trizol  
468 reagent (Life Technologies, Grand Island, NY) procedure from the bone marrow  
469 mononuclear cells (MNCs) of the ID and REL samples. The paired-end RNA sequencing was  
470 done on Illumina HiSeq4000 platform (multiplexing) in the high throughput sequencing  
471 core facility, German Cancer Research Center, Heidelberg, Germany. The RNA-Seq was  
472 performed by using six samples per lane, which resulted in an average of 64 Million  
473 mapped paired reads per sample. For methylation, genomic DNA was isolated using  
474 unstranded Allprep extraction (Qiagen, Hilden, Germany) from the bone marrow of same  
475 patients (ID and REL samples) was then hybridized onto an Illumina Infinium  
476 HumanMethylation450K. From the DNA methylation chip we identified 60,021 probes  
477 annotated to 7,190 lncRNAs.



## 478 **RNA-seq read alignment and quantitative extraction**

479 The STAR aligner (version 2.4.0.1) (67) (2-pass alignment parameters) was used to align  
480 paired-end reads to the human genome reference. The human genome reference files used  
481 for processing RNA-seq samples were the hg19 (GRCh37) genome version for alignment  
482 and transcript annotation from GENCODE version 19 (equivalent Ensembl GRCh37). The  
483 transcriptome construction and gene-level counts for each sample were obtained using  
484 StringTie (68). The read count information from the files generated by StringTie was  
485 extracted using the “prepDE.py” python script provided by the StringTie. We detected 84%  
486 of 13,860 lncRNAs (including 23,898 transcripts) annotated by GENCODE (V19) from our  
487 samples (FPKM > 0 for multi-exon lncRNAs and FPKM > 0 for single exonic lncRNAs)  
488 showing that our sequencing depth was good.

## 489 **Sample clustering and differential expression analysis for subtype- specific and** 490 **relapse-specific lncRNAs**

491 We performed PCA using the *prcomp* R function on 13,860 lncRNAs from RNA-seq and  
492 60,021 CpG's on lncRNAs from DNA methylation datasets. The PCA plots were plotted  
493 using python matplotlib axes3D function. The R bioconductor package Linear Models for  
494 Microarray (*LIMMA*) *Voom* (69) was used on gene-level expression data for identifying the  
495 subtype-specific and relapse-specific differentially expressed (DE) lncRNAs. The subtype-  
496 specific DE lncRNAs were identified by implementing separate design matrix for the three  
497 subtypes (DUX4, Ph-like and NH-HeH). Within each subtype, we used using all subtype  
498 samples versus the rest of the cohort. Within our cohort (82 samples from 46 patients), not  
499 all patients had matching ID and REL samples, and moreover, we wanted to compare across  
500 subtypes. LIMMA voom leveraged the sample imbalances and confounder (patient and  
501 samples) with its *duplicatecorrelation* function. We implemented *duplicatecorrelation*



502 function which addressed all patient effects by estimating correlations of multiple samples  
503 from the same patient while allowing us to compare across the subtypes. Additionally, we  
504 included the ID and REL time factors into the design (*makeContrasts*) to avoid the inflation  
505 of the variance due to time factor for each subtype. The relapse-specific DE lncRNAs within  
506 each subtype were identified by analysing DE lncRNAs ID versus REL samples within each  
507 subtype separately. The significant DE genes were assigned based on the p-value < 0.01  
508 and Fold change of  $\geq \pm 1.5$ . The lncRNAs from GENCODE version 19 (equivalent  
509 Ensembl GRCh37) were used as reference annotation. The heatmaps and correlation based  
510 (Spearman method) hierarchical clustering of DE lncRNAs were performed on z-score  
511 transformed LIMMA normalized gene expression values using the R Bioconductor package  
512 ComplexHeatmap.

### 513 **Differential methylation data analysis**

514 The ID and REL samples from the same patients have been assayed with the Illumina 450k  
515 methylation array. All the beta values have been normalized using the Subset-quantile  
516 Within Array Normalization (SWAN) method. In order to detect differentially methylated  
517 regions, we used the R package bumpHunter (70) using the most variant quartile of the  
518 CpG probes. BumpHunter searches for differentially methylated regions in an annotation-  
519 unbiased manner. Separate bumpHunter runs have been performed for ID and REL samples  
520 for every three subtypes (DUX4, Ph-like, and NH-HeH), using all subtype samples versus  
521 the rest of the cohort. We associated the differentially methylated regions from three BCP-  
522 ALL subtypes using HOMER (hypergeometric optimization of motif enrichment) suite of  
523 tool with the reference file GRCh37.74, using the -gene parameter. HOMER provided us  
524 with annotation of each probe, we separated lncRNAs from the output. The genomic  
525 regions were divided into promoter (+-2kb from transcription start site, TSS) and gene

526 body. The gene body was defined if the CpGs were annotated in exonic, intronic or  
527 transcription termination site (TTS). The regions mapped to lncRNAs were then used for  
528 analysis. The significantly differentially hyper-methylated (Methylation difference value  
529  $\geq 0.2$ ;  $P$ -value  $\leq 0.05$ ) and hypo-methylated (Methylation difference value  $\leq 0$ ;  $P$ -  
530 value  $\leq 0.05$ ) regions were used for further analysis. The intronic and intergenic  
531 differentially methylated (DM) lncRNAs were then mapped using 'BedTools' with the B-  
532 lymphocyte cell line "wgEncodeBroadHmmGm12878HMM.bed" in order to find the  
533 epigenetic markers. The significance of enrichment was calculated using Fisher's exact test.  
534 The epigenetically altered lncRNAs were assigned if promoter methylated lncRNAs were  
535 differentially expressed and their DNA methylation values (log-transformed Beta values)  
536 and expression values (log-transformed FPKM values) are correlated. The most significant  
537 correlations (Pearson correlations coefficient, 2-tailed  $P$ -value  $\leq 0.05$ ) were classified  
538 later called as epigenetically altered lncRNAs.

### 539 **Functional predictions using guilt-by-association approach**

540 In our study, we used the "guilt-by-association" (71) approach by establishing the pairwise  
541 expression correlations between DE lncRNAs (from all BCP-ALL subtypes) and its *cis* and  
542 *trans* protein-coding (PC) genes to predict the functions of subtype-specific lncRNAs. We  
543 located the *cis* and *trans* PC genes of DE lncRNAs using the GREAT tool (version v3.0.0)  
544 (72). All PC genes from GENCODE v19 annotation ( $n = 20698$ ) were used in the analysis.  
545 The individual *cis* and *trans* genes for each DE lncRNAs were located within a genomic  
546 window of 100 kb and greater  $>100$ kb respectively. From each dataset, we then computed  
547 the pairwise expression correlation using Pearson correlation method between each  
548 lncRNAs and its *cis* and *trans* coding gene. The significantly co-expressed PC genes (Pearson  
549 correlation coefficient  $\geq 0.55$  and 2-tailed  $P$ -value  $\leq 0.05$ ) were further used for

550 functional enrichment analysis using GeneSCF v1.0 (73). The functional enrichment  
551 analysis was performed using the KEGG database with a background of all protein-coding  
552 genes from GENCODE v19 (20,345). The functional terms were considered significant only  
553 if it is enriched with  $P$ -value  $\leq 0.05$ .

## 554 **ACKNOWLEDGEMENT**

555 We are grateful to Johanna Angermaier for discussions and Ulf Leser for the suggestions in  
556 data analysis.

## 557 **Author Contributions**

558 The project was conceived and designed by: ARJ, CDB, MN, AA. ARJ developed  
559 bioinformatics pipeline and analyzed RNA-seq data. MN normalized the methylation data.  
560 MSP performed DNA methylation data analysis. MPS, LB, MN and CDB performed the  
561 analyses of clinical and molecular data. JOT, CS and KI performed the sample preparation.  
562 CMT, MAR, MB, NG, RKS, AVS, MS, MH, TB, SS, HS, SG, RKS, CE were involved in the  
563 sample collection, genetic characterization and provided molecular diagnostic data. All  
564 authors were involved in writing and reviewing the manuscript.

## 565 REFERENCES

- 566 1. Portell CA, Wenzell CM, Advani AS. Clinical and pharmacologic aspects of  
567 blinatumomab in the treatment of B-cell acute lymphoblastic leukemia. *Clinical*  
568 *Pharmacology: Advances and Applications*. 2013. p. 5–11.
- 569 2. Ito C, Kumagai M, Manabe A, Coustan-Smith E, Raimondi SC, Behm FG, et al.  
570 Hyperdiploid acute lymphoblastic leukemia with 51 to 65 chromosomes: a distinct  
571 biological entity with a marked propensity to undergo apoptosis. *Blood*.  
572 1999;93(1):315–20.
- 573 3. Heerema NA, Nachman JB, Sather HN, Sensel MG, Lee MK, Hutchinson R, et al.  
574 Hypodiploidy with less than 45 chromosomes confers adverse risk in childhood acute  
575 lymphoblastic leukemia: a report from the children's cancer group. *Blood*.  
576 1999;94(12):4036–45.
- 577 4. Dun KA, Vanhaefen R, Batt TJ, Riley LA, Diano G, Williamson J. BCR-ABL1 gene  
578 rearrangement as a subclonal change in ETV6-RUNX1-positive B-cell acute  
579 lymphoblastic leukemia. *Blood Adv* [Internet]. 2016 Dec;1(2):132—138. Available  
580 from: <http://europepmc.org/articles/PMC5737165>
- 581 5. Lilljebjörn H, Fioretos T. New oncogenic subtypes in pediatric B-cell precursor acute  
582 lymphoblastic leukemia. *Blood*. 2017. p. 1395–401.
- 583 6. Mullighan CG. Genomic profiling of B-progenitor acute lymphoblastic leukemia. *Best*  
584 *Pract Res Clin Haematol* [Internet]. 2011;24(4):489–503. Available from:  
585 <http://linkinghub.elsevier.com/retrieve/pii/S1521692611000843>
- 586 7. Lilljebjörn H, Henningsson R, Hyrenius-Wittsten A, Olsson L, Orsmark-Pietras C, Von  
587 Palffy S, et al. Identification of ETV6-RUNX1-like and DUX4-rearranged subtypes in  
588 paediatric B-cell precursor acute lymphoblastic leukaemia. *Nat Commun*. 2016;7.
- 589 8. Jain N, Roberts KG, Jabbour E, Patel K, Eterovic AK, Chen K, et al. Ph-like acute  
590 lymphoblastic leukemia: A high-risk subtype in adults. *Blood*. 2017;129(5):572–81.
- 591 9. Paulsson K, Lilljebjörn H, Biloglav A, Olsson L, Rissler M, Castor A, et al. The genomic  
592 landscape of high hyperdiploid childhood acute lymphoblastic leukemia. *Nat Genet*.  
593 2015;47(6):672–6.
- 594 10. Holmfeldt L, Wei L, Diaz-Flores E, Walsh M, Zhang J, Ding L, et al. The genomic  
595 landscape of hypodiploid acute lymphoblastic leukemia. *Nat Genet*. 2013;45(3):242–  
596 52.
- 597 11. Garzon R, Volinia S, Papaioannou D, Nicolet D, Kohlschmidt J, Yan PS, et al.

- 598 Expression and prognostic impact of lncRNAs in acute myeloid leukemia. *Proc Natl*  
599 *Acad Sci U S A* [Internet]. 2014;111(52):18679–84. Available from:  
600 [http://www.pubmedcentral.nih.gov/articlerender.fcgi?](http://www.pubmedcentral.nih.gov/articlerender.fcgi?artid=4284555&tool=pmcentrez&rendertype=abstract)  
601 [artid=4284555&tool=pmcentrez&rendertype=abstract](http://www.pubmedcentral.nih.gov/articlerender.fcgi?artid=4284555&tool=pmcentrez&rendertype=abstract)
- 602 12. Chen S, Liang H, Yang H, Zhou K, Xu L, Liu J, et al. Long non-coding RNAs: The  
603 novel diagnostic biomarkers for leukemia. *Environmental Toxicology and*  
604 *Pharmacology*. 2017. p. 81–6.
- 605 13. Kung JTY, Colognori D, Lee JT. Long noncoding RNAs: Past, present, and future.  
606 *Genetics*. 2013;193(3):651–69.
- 607 14. Ward M, McEwan C, Mills JD, Janitz M. Conservation and tissue-specific transcription  
608 patterns of long noncoding RNAs. *J Hum Transcr* [Internet]. 2015;1(1):2–9.  
609 Available from:  
610 <http://www.tandfonline.com/doi/full/10.3109/23324015.2015.1077591>
- 611 15. Wang P, Ning S, Zhang Y, Li R, Ye J, Zhao Z, et al. Identification of lncRNA-  
612 associated competing triplets reveals global patterns and prognostic markers for  
613 cancer. *Nucleic Acids Res*. 2015;43(7):3478–89.
- 614 16. Guttman M, Rinn JL. Modular regulatory principles of large non-coding RNAs.  
615 *Nature*. 2012. p. 339–46.
- 616 17. Liu Q, Huang J, Zhou N, Zhang Z, Zhang A, Lu Z, et al. LncRNA loc285194 is a p53-  
617 regulated tumor suppressor. *Nucleic Acids Res*. 2013;41(9):4976–87.
- 618 18. Spizzo R, Almeida MI, Colombatti A, Calin GA. Long non-coding RNAs and cancer: A  
619 new frontier of translational research. *Oncogene*. 2012. p. 4577–87.
- 620 19. Sati S, Ghosh S, Jain V, Scaria V, Sengupta S. Genome-wide analysis reveals distinct  
621 patterns of epigenetic features in long non-coding RNA loci. *Nucleic Acids Res*.  
622 2012;40(20):10018–31.
- 623 20. Yoon J-H, Abdelmohsen K, Gorospe M. Posttranscriptional Gene Regulation by Long  
624 Noncoding RNA. *J Mol Biol*. 2013;425(19):3723–30.
- 625 21. Cheetham SW, Gruhl F, Mattick JS, Dinger ME. Long noncoding RNAs and the  
626 genetics of cancer. *Br J Cancer* [Internet]. 2013;108(12):2419–25. Available from:  
627 <http://www.nature.com/doi/10.1038/bjc.2013.233>
- 628 22. Gong J, Liu W, Zhang J, Miao X, Guo A-Y. lncRNASNP: a database of SNPs in  
629 lncRNAs and their potential functions in human and mouse. *Nucleic Acids Res*  
630 [Internet]. 2015;43(D1):D181–6. Available from:  
631 <https://academic.oup.com/nar/article-lookup/doi/10.1093/nar/gku1000>
- 632 23. Zhang Y-Y, Huang S-H, Zhou H-R, Chen C-J, Tian L-H, Shen J-Z. Role of HOTAIR in

- 633 the diagnosis and prognosis of acute leukemia. *Oncol Rep.* 2016;36(6):3113–22.
- 634 24. Wei S, Wang K. Long noncoding RNAs: pivotal regulators in acute myeloid leukemia.  
635 *Exp Hematol Oncol* [Internet]. 2015;5(1):30. Available from:  
636 <http://ehonline.biomedcentral.com/articles/10.1186/s40164-016-0059-9>
- 637 25. Ronchetti D, Manzoni M, Agnelli L, Vinci C, Fabris S, Cutrona G, et al. LncRNA  
638 profiling in early-stage chronic lymphocytic leukemia identifies transcriptional  
639 fingerprints with relevance in clinical outcome. *Blood Cancer J.* 2016;6(9).
- 640 26. Gioia R, Drouin S, Ouimet M, Caron M, St-Onge P, Richer C, et al. LncRNAs  
641 downregulated in childhood acute lymphoblastic leukemia modulate apoptosis, cell  
642 migration, and DNA damage response. *Oncotarget* [Internet]. 2017; Available from:  
643 <http://www.oncotarget.com/fulltext/20817>
- 644 27. Derrien T, Johnson R, Bussotti G, Tanzer A, Djebali S, Tilgner H, et al. The GENCODE  
645 v7 catalog of human long noncoding RNAs: Analysis of their gene structure,  
646 evolution, and expression. *Genome Res.* 2012;22(9):1775–89.
- 647 28. Yan X, Hu Z, Feng Y, Hu X, Yuan J, Zhao SD, et al. Comprehensive Genomic  
648 Characterization of Long Non-coding RNAs across Human Cancers. *Cancer Cell.*  
649 2015;28(4):529–40.
- 650 29. Ning S, Zhang J, Wang P, Zhi H, Wang J, Liu Y, et al. Lnc2Cancer: A manually  
651 curated database of experimentally supported lncRNAs associated with various  
652 human cancers. *Nucleic Acids Res.* 2016;44(D1):D980–5.
- 653 30. Colombo T, Farina L, Macino G, Paci P. PVT1: A rising star among oncogenic long  
654 noncoding RNAs. *BioMed Research International.* 2015.
- 655 31. Pickard MR, Mourtada-Maarabouni M, Williams GT. Long non-coding RNA GAS5  
656 regulates apoptosis in prostate cancer cell lines. *Biochim Biophys Acta.*  
657 2013;1832(10):1613–23.
- 658 32. Petri A, Dybkær K, Bøgsted M, Thruø CA, Hagedorn PH, Schmitz A, et al. Long  
659 noncoding RNA expression during human B-cell development. *PLoS One.*  
660 2015;10(9).
- 661 33. Guil S, Esteller M. Cis-acting noncoding RNAs: friends and foes. *Nat Struct Mol Biol*  
662 [Internet]. 2012;19(11):1068–75. Available from:  
663 <http://www.nature.com/doifinder/10.1038/nsmb.2428>
- 664 34. Mondal T, Subhash S, Vaid R, Enroth S, Uday S, Reinius B, et al. MEG3 long  
665 noncoding RNA regulates the TGF- $\beta$  pathway genes through formation of RNA-DNA  
666 triplex structures. *Nat Commun.* 2015;6.
- 667 35. Pandey RR, Mondal T, Mohammad F, Enroth S, Redrup L, Komorowski J, et al.

- 668 Kcnq1ot1 Antisense Noncoding RNA Mediates Lineage-Specific Transcriptional  
669 Silencing through Chromatin-Level Regulation. *Mol Cell*. 2008;32(2):232–46.
- 670 36. Ali MM, Akhade VS, Kosalai ST, Subhash S, Statello L, Meryet-Figuere M, et al. PAN-  
671 cancer analysis of S-phase enriched lncRNAs identifies oncogenic drivers and  
672 biomarkers. *Nat Commun*. 2018;9(1).
- 673 37. Sadras T, Heatley SL, Kok CH, Dang P, Galbraith KM, McClure BJ, et al. Differential  
674 expression of MUC4, GPR110 and IL2RA defines two groups of CRLF2-rearranged  
675 acute lymphoblastic leukemia patients with distinct secondary lesions. *Cancer Lett*.  
676 2017;408:92–101.
- 677 38. Dong M, Blobe GC. Role of transforming growth factor-beta in hematologic  
678 malignancies. *Blood* [Internet]. 2006;107(12):4589–96. Available from:  
679 [http://www.pubmedcentral.nih.gov/articlerender.fcgi?](http://www.pubmedcentral.nih.gov/articlerender.fcgi?artid=1895802&tool=pmcentrez&rendertype=abstract)  
680 [artid=1895802&tool=pmcentrez&rendertype=abstract](http://www.pubmedcentral.nih.gov/articlerender.fcgi?artid=1895802&tool=pmcentrez&rendertype=abstract)
- 681 39. Scheicher R, Hoelbl-Kovacic A, Bellutti F, Tigan A-S, Prchal-Murphy M, Heller G, et  
682 al. CDK6 as a key regulator of hematopoietic and leukemic stem cell activation.  
683 *Blood*. 2015. 90-101 p.
- 684 40. Wang Y-Y, Wu Z-Y, Wang G-C, Liu K, Niu X-B, Gu S, et al. LINC00312 inhibits the  
685 migration and invasion of bladder cancer cells by targeting miR-197-3p. *Tumor Biol*  
686 [Internet]. 2016;37(11):14553–63. Available from:  
687 <http://link.springer.com/10.1007/s13277-016-5303-8>
- 688 41. Saitou M, Sugimoto J, Hatakeyama T, Russo G, Isobe M. Identification of the TCL6  
689 genes within the breakpoint cluster region on chromosome 14q32 in T-cell leukemia.  
690 *Oncogene*. 2000;19:2796–802.
- 691 42. Mitra R, Chen X, Greenawalt EJ, Maulik U, Jiang W, Zhao Z, et al. Decoding critical  
692 long non-coding RNA in ovarian cancer epithelial-to-mesenchymal transition. *Nat*  
693 *Commun*. 2017;8(1).
- 694 43. ENCODE Project Consortium AIE of DE in the H. An integrated encyclopedia of DNA  
695 elements in the human genome. *Nature*. 2012;489(7414):57–74.
- 696 44. Wu HK, Weksberg R, Minden MD, Squire JA. Loss of imprinting of human insulin-like  
697 growth factor II gene, IGF2, in acute myeloid leukemia. *Biochem Biophys Res*  
698 *Commun*. 1997;231(2):466–72.
- 699 45. Lu H, Kojima K, Battula VL, Korchin B, Shi Y, Chen Y, et al. Targeting connective  
700 tissue growth factor (CTGF) in acute lymphoblastic leukemia preclinical models:  
701 Anti-CTGF monoclonal antibody attenuates leukemia growth. *Ann Hematol*.  
702 2014;93(3):485–92.
- 703 46. Fu L, Fu H, Wu Q, Pang Y, Xu K, Zhou L, et al. High expression of ETS2 predicts poor



- 704 prognosis in acute myeloid leukemia and may guide treatment decisions. *J Transl*  
705 *Med.* 2017;15(1).
- 706 47. Van Grembergen O, Bizet M, de Bony EJ, Calonne E, Putmans P, Brohée S, et al.  
707 Portraying breast cancers with long noncoding RNAs. *Sci Adv* [Internet].  
708 2016;2(9):e1600220. Available from:  
709 <http://www.ncbi.nlm.nih.gov/pubmed/27617288>  
710 <http://www.pubmedcentral.nih.gov/articlerender.fcgi?artid=PMC5010371>
- 711 48. Zhao W, Luo J, Jiao S. Comprehensive characterization of cancer subtype associated  
712 long non-coding RNAs and their clinical implications. *Sci Rep* [Internet].  
713 2014;4:6591. Available from: [http://www.pubmedcentral.nih.gov/articlerender.fcgi?](http://www.pubmedcentral.nih.gov/articlerender.fcgi?artid=4194441&tool=pmcentrez&rendertype=abstract)  
714 [artid=4194441&tool=pmcentrez&rendertype=abstract](http://www.pubmedcentral.nih.gov/articlerender.fcgi?artid=4194441&tool=pmcentrez&rendertype=abstract)
- 715 49. Chen H, Xu J, Hong J, Tang R, Zhang X, Fang JY. Long noncoding RNA profiles  
716 identify five distinct molecular subtypes of colorectal cancer with clinical relevance.  
717 *Mol Oncol.* 2014;8(8):1393–403.
- 718 50. Zhou M, Guo M, He D, Wang X, Cui Y, Yang H, et al. A potential signature of eight  
719 long non-coding RNAs predicts survival in patients with non-small cell lung cancer. *J*  
720 *Transl Med* [Internet]. 2015;13(1):231. Available from: [http://www.translational-](http://www.translational-medicine.com/content/13/1/231)  
721 [medicine.com/content/13/1/231](http://www.translational-medicine.com/content/13/1/231)
- 722 51. Wang Y, Fu L, Cui M, Wang Y, Xu Y, Li M, et al. Amino acid transporter SLC38A3  
723 promotes metastasis of non-small cell lung cancer cells by activating PDK1. *Cancer*  
724 *Lett.* 2017;393:8–15.
- 725 52. Mogilyansky E, Rigoutsos I. The miR-17/92 cluster: A comprehensive update on its  
726 genomics, genetics, functions and increasingly important and numerous roles in  
727 health and disease. *Cell Death Differ* [Internet]. Nature Publishing Group;  
728 2013;20(12):1603–14. Available from: <http://dx.doi.org/10.1038/cdd.2013.125>
- 729 53. Zhong L, Lou G, Zhou X, Qin Y, Liu L, Jiang W. A six-long non-coding RNAs signature  
730 as a potential prognostic marker for survival prediction of ER-positive breast cancer  
731 patients. *Oncotarget.* 2017;8(40):3762–72.
- 732 54. Han Z, Shi L. Long non-coding RNA LUCAT1 modulates methotrexate resistance in  
733 osteosarcoma via miR-200c/ABCB1 axis. *Biochem Biophys Res Commun* [Internet].  
734 Elsevier Ltd; 2018;495(1):947–53. Available from:  
735 <https://doi.org/10.1016/j.bbrc.2017.11.121>
- 736 55. Wang Y, Li Y, Yang Z, Liu K, Wang D. Genome-wide microarray analysis of long non-  
737 coding RNAs in Eutopic secretory endometrium with endometriosis. *Cell Physiol*  
738 *Biochem.* 2015;37(6):2231–45.
- 739 56. Placke T, Faber K, Nonami A, Putwain SL, Salih HR, Heidel FH, et al. Requirement



- 740 for CDK6 in MLL-rearranged acute myeloid leukemia. *Blood*. 2014;124(1):13–23.
- 741 57. Chiu HS, Somvanshi S, Patel E, Chen TW, Singh VP, Zorman B, et al. Pan-Cancer  
742 Analysis of lncRNA Regulation Supports Their Targeting of Cancer Genes in Each  
743 Tumor Context. *Cell Rep*. 2018;23(1):297–312.e12.
- 744 58. Mondal T, Subhash S, Vaid R, Enroth S, Uday S, Reinius B, et al. MEG3 long  
745 noncoding RNA regulates the TGF- $\beta$  pathway genes through formation of RNA-DNA  
746 triplex structures. *Nat Commun* [Internet]. 2015;6:7743. Available from:  
747 [http://www.nature.com/ncomms/2015/150724/ncomms8743/full/ncomms8743.ht](http://www.nature.com/ncomms/2015/150724/ncomms8743/full/ncomms8743.html)  
748 [ml](http://www.nature.com/ncomms/2015/150724/ncomms8743/full/ncomms8743.html)  
749 <http://www.nature.com/doi/10.1038/ncomms8743>  
750 <http://www.ncbi.nlm.nih.gov/pubmed/26205790>
- 751 59. Neri LM, Cani A, Martelli AM, Simioni C, Junghanss C, Tabellini G, et al. Targeting  
752 the PI3K/Akt/mTOR signaling pathway in B-precursor acute lymphoblastic leukemia  
753 and its therapeutic potential. *Leukemia*. 2014;28(4):739–48.
- 754 60. Hui Z, Xianglin M, Access O. Association of HOTAIR expression with PI3K / Akt  
755 pathway activation in adenocarcinoma of esophagogastric junction. 2016;36–40.
- 756 61. Feng N, Ching T, Wang Y, Liu B, Lin H, Shi O, et al. Analysis of microarray data on  
757 gene expression and methylation to identify long non-coding RNAs in non-small cell  
758 lung cancer. *Sci Rep*. 2016;6.
- 759 62. Askarian-Amiri ME, Seyfoddin V, Smart CE, Wang J, Kim JE, Hansji H, et al.  
760 Emerging role of long non-coding RNA SOX2OT in SOX2 regulation in breast cancer.  
761 *PLoS One*. 2014;9(7).
- 762 63. Zhang W, Huang C, Gong Z, Zhao Y, Tang K, Li X, et al. Expression of LINC00312, a  
763 long intergenic non-coding RNA, is negatively correlated with tumor size but  
764 positively correlated with lymph node metastasis in nasopharyngeal carcinoma. *J Mol*  
765 *Histol*. 2013;44(5):545–54.
- 766 64. Li JR, Sun CH, Li W, Chao RF, Huang CC, Zhou XJ, et al. Cancer RNA-Seq Nexus: A  
767 database of phenotype-specific transcriptome profiling in cancer cells. *Nucleic Acids*  
768 *Res*. 2016;44(D1):D944–51.
- 769 65. Tseng YY, Moriarity BS, Gong W, Akiyama R, Tiwari A, Kawakami H, et al. PVT1  
770 dependence in cancer with MYC copy-number increase. *Nature*. 2014;512(1):82–6.
- 771 66. L'Abbate A, Tolomeo D, Cifola I, Severgnini M, Turchiano A, Augello B, et al. MYC-  
772 containing amplicons in acute myeloid leukemia: genomic structures, evolution, and  
773 transcriptional consequences. *Leukemia*. 2018;1–15.
- 774 67. Dobin A, Davis CA, Schlesinger F, Drenkow J, Zaleski C, Jha S, et al. STAR: Ultrafast  
775 universal RNA-seq aligner. *Bioinformatics*. 2013;29(1):15–21.

- 776 68. Pertea M, Pertea GM, Antonescu CM, Chang TC, Mendell JT, Salzberg SL. StringTie  
777 enables improved reconstruction of a transcriptome from RNA-seq reads. *Nat*  
778 *Biotechnol.* 2015;33(3):290–5.
- 779 69. Ritchie ME, Phipson B, Wu D, Hu Y, Law CW, Shi W, et al. Limma powers differential  
780 expression analyses for RNA-sequencing and microarray studies. *Nucleic Acids Res.*  
781 2015;43(7):e47.
- 782 70. Jaffe AE, Murakami P, Lee H, Leek JT, Fallin MD, Feinberg AP, et al. Bump hunting  
783 to identify differentially methylated regions in epigenetic epidemiology studies. *Int J*  
784 *Epidemiol.* 2012;41(1):200–9.
- 785 71. Guo X, Gao L, Liao Q, Xiao H, Ma X, Yang X, et al. Long non-coding RNAs function  
786 annotation: A global prediction method based on bi-colored networks. *Nucleic Acids*  
787 *Res.* 2013;41(2).
- 788 72. McLean CY, Bristor D, Hiller M, Clarke SL, Schaar BT, Lowe CB, et al. GREAT  
789 improves functional interpretation of cis-regulatory regions. *Nat Biotechnol.*  
790 2010;28(5):495–501.
- 791 73. Subhash S, Kanduri C. GeneSCF: A real-time based functional enrichment tool with  
792 support for multiple organisms. *BMC Bioinformatics.* 2016;17(1).

793

## 794 **Supporting Information caption**

### 795 **Fig S1: The distribution of lncRNAs and PC gene expression and DNA methylation**

796 **levels across samples.** (A) The level of distribution of expression between 13460 lncRNAs  
797 and 20,135 PC genes across 82 BCP-ALL samples. (B) The level of distribution of DNA  
798 methylation rate between 60,022 CpGs probes associated with lncRNAs region and 120,000  
799 CpGs probes associated with PC genes across 82 BCP-ALL samples.

### 800 **Fig S2: BCP-ALL subtype-specific differentially expressed lncRNAs.** (A-C) The

801 hierarchical clustering representing lncRNAs clustering and expression differences of the  
802 compared subtypes DUX4, Ph-like and NH-HeH; corresponding to 736, 383, and 445  
803 subtype-specific DE lncRNAs in DUX4, Ph-like and NH-HeH subtypes, respectively. In the  
804 DUX4 subtype, 100% of samples clustered together based on the DE lncRNAs signature.  
805 The hierarchical clustering of the subtype-specific DE lncRNAs revealed that 90% (19 out of  
806 21 samples) of Ph-like samples clustered within the predefined Ph-like subtype. For the NH-  
807 HeH subtype 69% (11 out of 16 samples) of samples correlated and clustered together  
808 using the respective DE lncRNA signature. The BCP-ALL samples box representing the  
809 number of samples within each subtypes and versus (vs) the other samples used as control  
810 group in DE analysis. (D) The overlap between DE subtype specific lncRNAs from three  
811 subtypes versus public list of dysregulated lncRNAs from 12 different cancer types  
812 comprehensive cancer genome (CGC)

### 813 **Fig S3: Comparison of molecular pathways from cis and trans based analysis on**

814 **subtype-specific DE lncRNAs.** (A) Molecular pathway analysis from functional enrichment  
815 analysis on *trans* ( $\geq 100$  kb) protein-coding genes correlated (Pearson correlation  
816 coefficient  $\geq 0.55$  and two-tailed  $P$ -value  $\leq 0.05$ ) with DE lncRNAs in DUX4 subtype.

817 (B) The molecular pathways overlapped between *cis* (< 100 kb proximity) and *trans* (>  
818 100 kb) based functional enrichment analysis in the DUX4 subtype. (C) Molecular pathway  
819 analysis from functional enrichment analysis on *trans* (> 100 kb) protein-coding genes  
820 correlated (Pearson correlation coefficient  $\geq 0.55$  and two-tailed *P*-value  $\leq 0.05$ ) with  
821 DE lncRNAs in Ph-like subtype. CAMs : Cell adhesion molecules, CML: Chronic myeloid  
822 leukemia , AML: Acute myeloid leukemia.

823 **Fig S4: The subtype-specific lncRNAs co-expressed with oncogenes involved in key**  
824 **signaling pathways in DUX4 and Ph-like subtypes.** (A-B) Antisense *RP11-224019.2*  
825 (absolute Fold change = 2.786, *P*-value = 9.74E-08) and its *cis* oncogene *TGFB2* (absolute  
826 Fold change = 3.84, *P*-value = 2.74E-10) are significantly up-regulated in DUX4 samples.  
827 (C) Antisense lncRNAs *R11-536K7.5* located at *cis* region of oncogene *IL2RA*. Expression of  
828 antisense lncRNA *RP11-536K7.5* showed significant co-expression with expression of its *cis*  
829 oncogene *IL2RA*. Both *RP11-536K7.5* (absolute Fold change = 2.79, *P*-value = 3.07E-008)  
830 and *IL2RA* (absolute Fold change = 3.11, *P*-value = 3.97e-1) are up-regulated in Ph-like  
831 samples. (D) The expression of *cis* antisense lncRNA *AC002454.1* significant co-expressed  
832 with its *cis* oncogene *CDK6* in Ph-like subtype. Both *CDK6* (absolute Fold change = 1.01, *P*-  
833 value = 0.0005) and antisense lncRNA *AC002454.1* (absolute Fold change = 1.79, *P*-value  
834 = 0.00015) are up-regulated in Ph-like samples.

835 **Table S1. RNA-seq data used for analysis and subtype-specific lncRNAs from three**  
836 **subtypes**

837 **Table S2. The functionally involved subtype-specific lncRNAs from DUX4 and Ph-like**  
838 **subtypes. The trans and cis-acting subtype-specific lncRNAs**

839 **Table S3. The relapse-specific lncRNAs from three subtypes. The lncRNAs involved in**  
840 **functions from DUX4 subtype**

841 **Table S4. DNA methylation array dataset. The differentially methylated lncRNAs from**  
842 **three subtypes. List of cis-acting epigenetically active lncRNAs.**

### 843 **Figure captions**

844 **Fig 1: BCP-ALL subtype-specific lncRNA expression signatures.**

845 (A) PCA plot constructed from expression FPKM values of lncRNAs from 82 BCP-ALL  
846 samples obtained from RNA-seq. Each point represents a BCP-ALL sample. DUX4, Ph-like,  
847 NH-HeH, LH subtype and others are represented by orange, rose, blue, green and gray  
848 respectively. (B) Heatmap illustrates hierarchical clustering DE subtype-specific lncRNAs  
849 (absolute Fold change  $\geq \pm 1.5$ ,  $P$ -value  $\leq 0.01$ ) signature based on z-score  
850 transformed LIMMA normalized expression values on 930 subtype-specific lncRNAs from  
851 DUX4 ( $n = 450$ ), Ph-like ( $n = 193$ ), and NH-HeH ( $n = 287$ ) subtypes. (C) The venn  
852 diagram illustrates the overlap between subtype-specific lncRNAs from three subtypes,  
853 showing 24 lncRNAs are to be common for all three subtypes.

854 **Fig 2: The molecular pathways of lncRNAs involved in the DUX4 and Ph-like BCP-ALL**  
855 **subgroups.**

856 (A) The plot depicts the molecular pathway analysis from the functional enrichment  
857 analysis for nearby ( $\leq 100$  kb proximity) cis protein-coding genes correlated (Pearson  
858 correlation coefficient  $\geq 0.55$  and 2-tailed  $P$ -value  $\leq 0.05$ ) with DE lncRNAs in the  
859 DUX4 subtype. (B) The plot depicts the molecular pathway analysis from the functional  
860 enrichment analysis for nearby ( $\leq 100$  kb proximity) cis protein-coding genes correlated  
861 (Pearson correlation coefficient  $\geq 0.55$  and 2-tailed  $P$ -value  $\leq 0.05$ ) with DE lncRNAs  
862 in the Ph-like subtype. (C) The heatmap depicts the concordance between the protein-  
863 coding and lncRNAs based predictions for DUX4 subtypes. (D) The heatmap depicts the  
864 overlapping pathways from both lncRNAs and protein-coding in the Ph-like subtype. The

865 KEGG pathways or biological functions presented in the heatmaps and barplots show with  
866  $P$ -value  $\leq 0.05$  and  $> 2$  genes involved in each pathways. The hypergeometric  $p$ -values  
867 are obtained from GeneSCF for the pathways. CAMs : Cell adhesion molecules, CML :  
868 Chronic myeloid leukemia, AML : Acute myeloid leukemia.

869 **Fig 3: Relapse-specific DE lncRNAs from BCP-ALL subtypes.**

870 (A-C) Heatmap depicting the hierarchical clustering on relapse-specific DE lncRNAs  
871 signature on Z-score transformed LIMMA normalized expression values from DUX4, Ph-like  
872 and NH-HeH subtypes. Each heatmap shows the up and down regulated lncRNAs specific to  
873 ID and REL samples. (D) Molecular pathway analysis with the number of genes involved in  
874 each pathway from the enrichment analysis of the nearby ( $< 100$  kb proximity) cis protein-  
875 coding genes correlated (Pearson correlation  $> 0.55$  and  $P$ -value  $\leq 0.05$ ) with relapse-  
876 specific DE lncRNAs in the DUX4 subtype. The legend box indicates the number of ID and  
877 REL samples within each group. CAMs : Cell adhesion molecules. (E) The overlap between  
878 relapse-specific and subtype-specific lncRNAs from three subtypes.

879 **Fig 4: Hierarchical clustering of CGID's associated with DM lncRNAs.**

880 (A) PCA of CpG's associated with lncRNAs on SWAN normalized  $\beta$  values on 82 BCP-ALL  
881 samples obtained from DNA methylation array. Each point represents a BCP-ALL sample.  
882 DUX4, Ph-like, NH-HeH, LH and others are represented by orange, rose, blue, green and  
883 gray, respectively. (B) The heatmap representing hierarchal clustering on 544 differentially  
884 methylated (DM) CGID's associated with 434 lncRNAs in DUX4 subtype. In the DUX4  
885 subtype, we identified 328 (76%) differentially hypo-methylated and 106 (25%) hyper-  
886 methylated lncRNAs. (C) The heatmap representing hierarchal clustering on 518 DM  
887 CGID's associated with 450 lncRNAs in the Ph-like subtype. In Ph-like subtype, we observed  
888 302 (67%) hyper-methylated lncRNAs and 148 (33%) hypo-methylated lncRNAs. (D) The

889 heatmap representing hierarchal clustering on 295 DM CGID's associated with 234 lncRNAs  
890 in NH-HeH subtype. In the NH-HeH subtype, we identified 200 (86%) hypo-methylated  
891 and 34 (14%) hyper-methylated lncRNAs. The heatmap is plotted using SWAN normalized  
892 beta values. The barplots below each heatmap represents the distribution of DM lncRNAs in  
893 the genome (Promoter-TSS and gene body) lncRNAs from each subtype. The distribution  
894 DM Promoter-TSS lncRNAs are as follows: 25%, 29% and 39% in DUX4, Ph-like, and NH-  
895 HeH subtype, respectively.

896 **Fig 5: The epigenetically altered promoter methylated lncRNAs and their expression.**

897 (A) The promoter methylated lncRNAs with significant negative correlation with DE  
898 expression profile from the DUX4 subtypes. (B-C) Two representative examples of hypo-  
899 methylated lncRNAs with increased expression profile from DUX4 subtype. lncRNAs, *RP11-*  
900 *138M12.1* (Pearson correlation coefficient = -0.69, 2-tailed *P*-value = 5.21e-13), *RP11-*  
901 *624MB.1* (Pearson correlation coefficient = -0.50, *P*-value = 1.36e-06) are examples with  
902 hypo-methylation and up-regulated expression pattern with significant inverse correlation  
903 between DNA methylation and expression levels. (D) The promoter methylated lncRNAs  
904 with significant negative correlation with DE expression profile from the Ph-like subtypes.  
905 (E) A representative example of the promoter hyper-methylated lncRNA, *RP11-138M12.1*  
906 (Pearson correlation coefficient = -0.69, 2-tailed *P*-value = 5.21e-13) with down-regulated  
907 expression pattern, and with inverse correlation within the Ph-like subtype.

908 **Fig 6: Differentially methylated lncRNAs epigenetically altered expression levels of the**  
909 ***cis* oncogenes.**

910 (A) The upper panel of boxplot represents the DNA methylated lncRNAs, the boxplot  
911 below that represents their corresponding *cis* oncogenes which are up-regulated in DUX4



912 subtype. The barplot shows representative examples of hypo-methylated lncRNAs, *RP11-*  
913 *80H8.4* (DNA methylation value = -4.87 , *P*-value = 0.0001), *IGF-AS2* (DNA methylation  
914 value = -1.52, *P*-value = 0.011), *RP11-332H18.4* (DNA methylation value = 1.79 , *P*-value  
915 = 0.0057 ), *RGMB-AS1* (DNA methylation value = -1.47, *P*-value = 0.007), and *RP11-*  
916 *125B21.2* (DNA methylation value = -1.75, *P*-value = 0.007) and its corresponding  
917 significantly up-regulated *cis* oncogenes, *CHT2* (absolute log fold change = 5.021, FDR =  
918 2.39E-08), *IGF2* (absolute log fold change = 6.71, FDR = 41.412E-15), *TBX* (absolute log  
919 fold change = 5.64, FDR = 3.97E-13), and *RGMB* (absolute log fold change = 4.42, FDR =  
920 3.02E-16) within DUX4 subtype. (B) The upper panel of boxplot represents the DNA  
921 methylated lncRNAs, the boxplot below that represents their corresponding *cis* oncogenes  
922 which are up-regulated in Ph-like subtype. The barplot shows representative examples of  
923 hypo-methylated lncRNAs, *RP11-69l8.3* (DNA methylation value = -3.16, *P*-value = 4.46E-  
924 08), *LINC00996* (DNA methylation value = -1.55, *P*-value = 0.02 ), *CTB-79E8.2* ( DNA  
925 methylation value = -2.22, *P*-value = 0.009 ), *RP11-420G6.4* (DNA methylation value =  
926 -2.43, *P*-value = 0.004 ) and its corresponding significantly up-regulated *cis* oncogenes,  
927 *CTGF* ( absolute log fold change = 1.85, = 0.02 ), *GIMAP8* (absolute log fold change =  
928 1.14, FDR = 0.004), *NEURLB* (absolute log fold change = 1.14, FDR = 0.09), *SERPINB1*  
929 (absolute log fold change = 1.63, FDR = 0.0004) within Ph-like subtype. (C) The upper  
930 panel of boxplot represents the DNA methylated lncRNAs, the boxplot below that  
931 represents their *cis* oncogenes which are up-regulated in NH-HeH subtype. The barplot  
932 shows representative examples of hypo-methylated lncRNAs, *LINC00114* (DNA methylation  
933 value = -2.97, *P*-value = 0.0003), *RP11-293A21.1* (DNA methylation value = -3.69, *P*-  
934 value = 0.00071) and its corresponding significantly up-regulated *cis* oncogenes, *ETS2*  
935 (absolute Fold change = 0.99, FDR = 0.019) and *STIM2* (absolute Fold change = 2.48,



936 FDR = 6.42E-10) within NH-HeH subtype. False discovery rate: FDR

## 937 **AVAILABILITY OF DATA AND ACCESSION NUMBERS**

938 All sequencing data used in this study is available at the European Genome  
939 phenome Archive (accession number to be provided after acceptance of the manuscript)

## 940 **FUNDING**

941 This work was supported by the German Cancer Aid (Deutsche Krebshilfe) [grant number  
942 111533].

A

bioRxiv preprint doi: <https://doi.org/10.1101/365429>; this version posted July 9, 2018. The copyright holder for this preprint (which was not certified by peer review) is the author/funder, who has granted bioRxiv a license to display the preprint in perpetuity. It is made available under aCC-BY 4.0 International license.

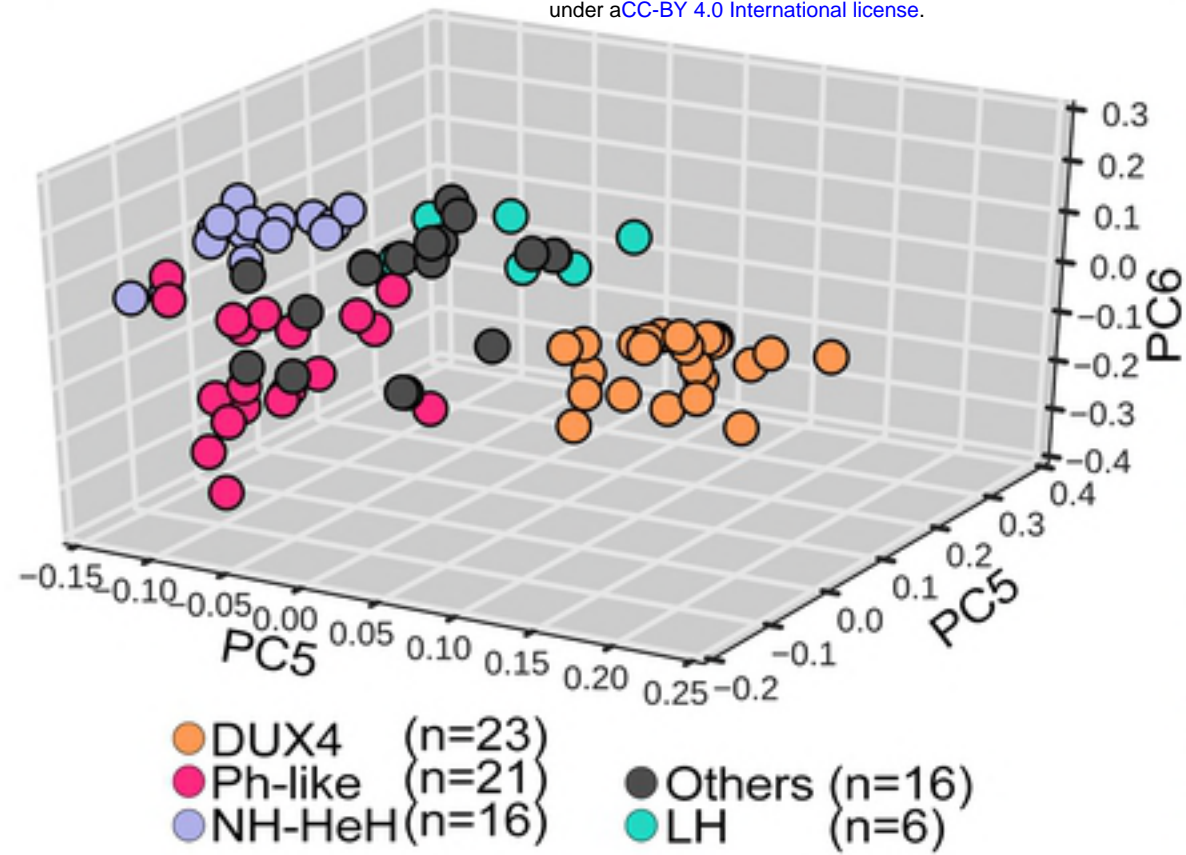

D

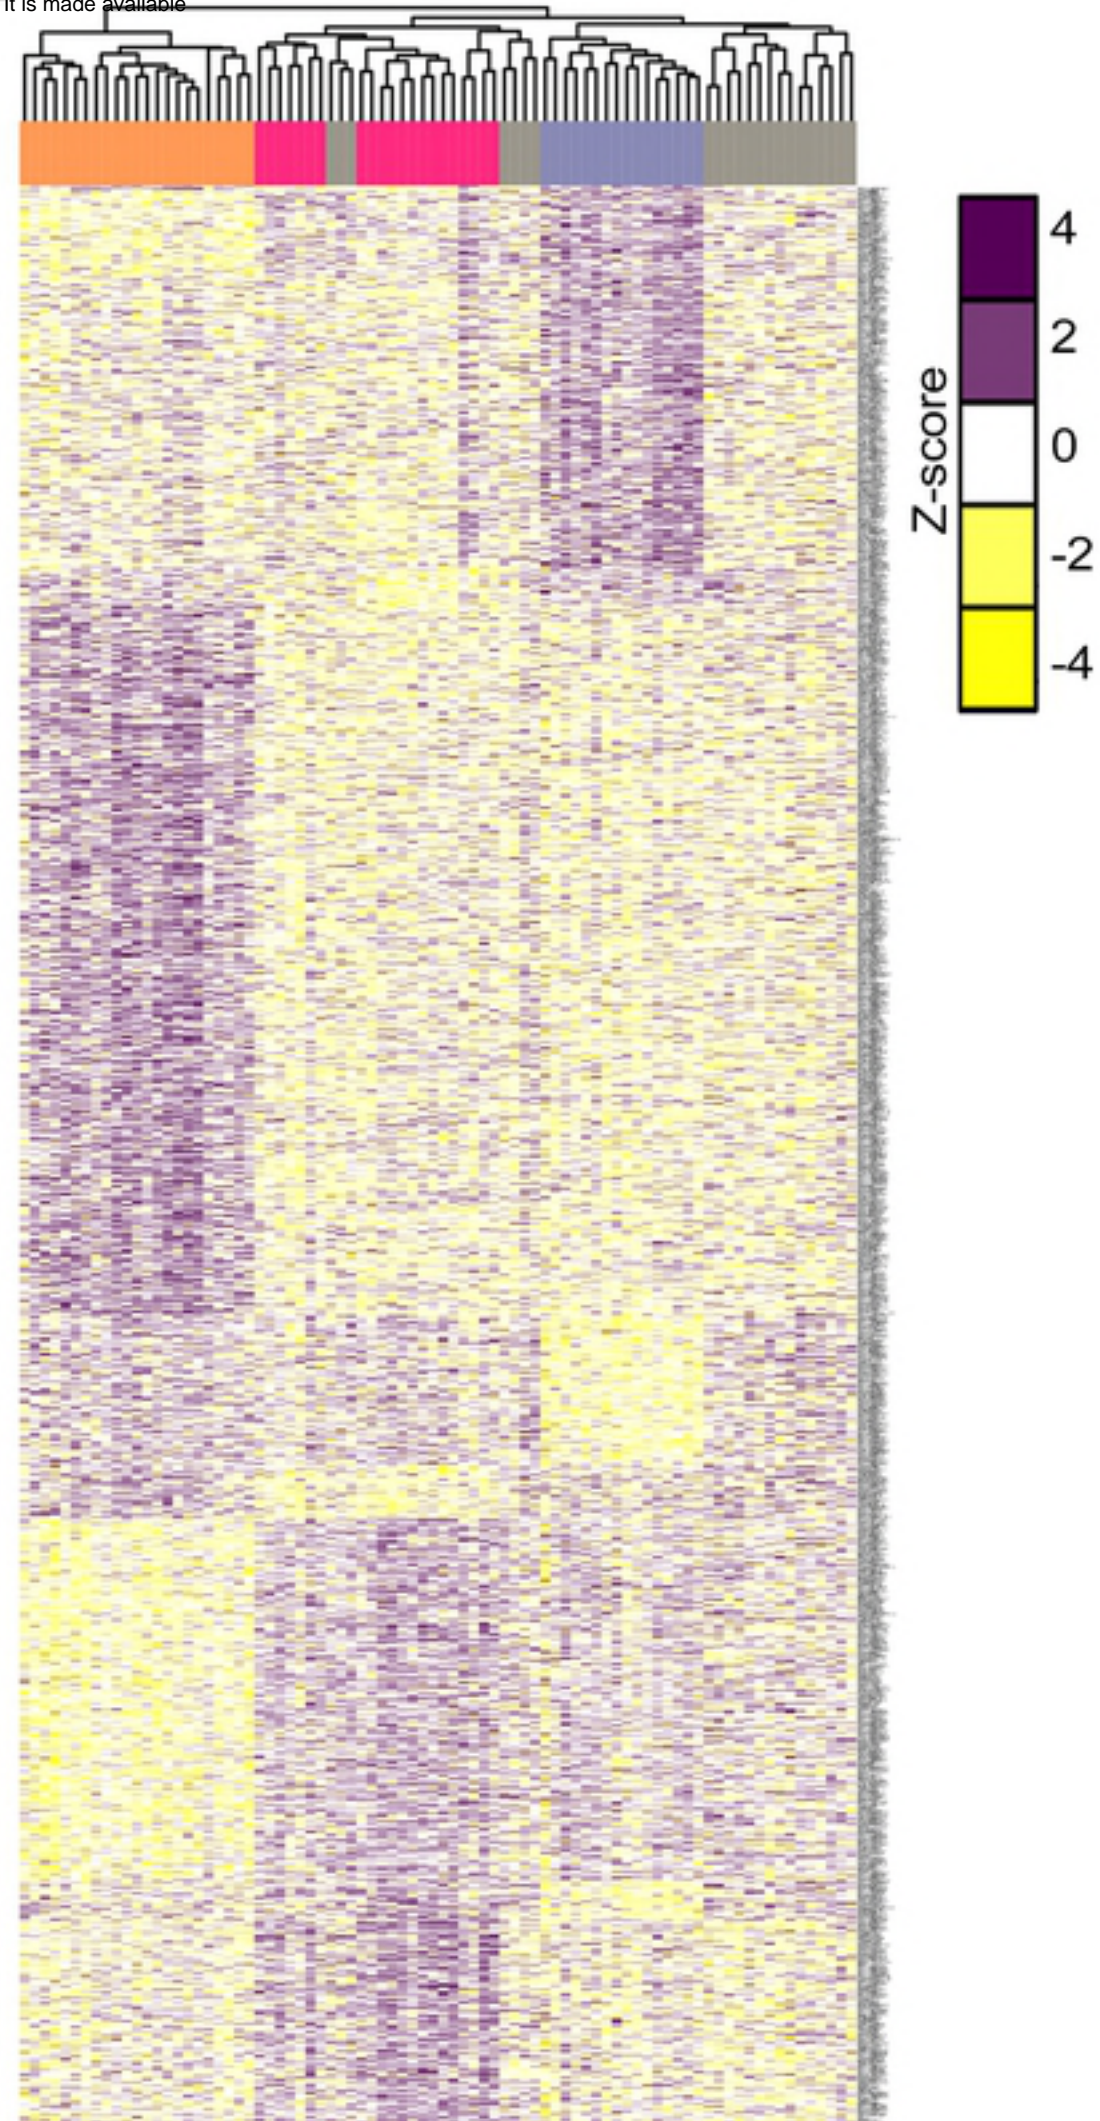

C

Ph-like (n=383)

DUX4 (n=736)

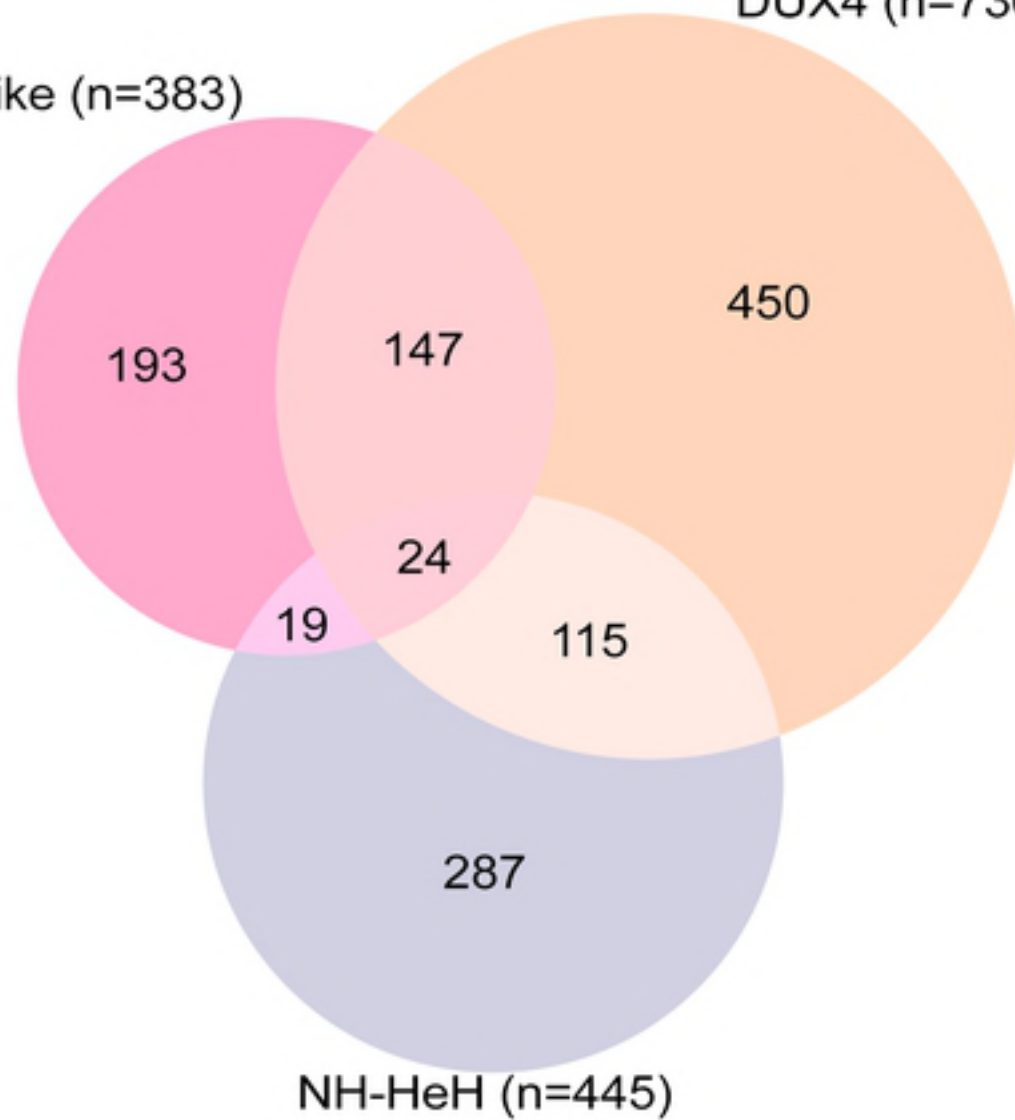



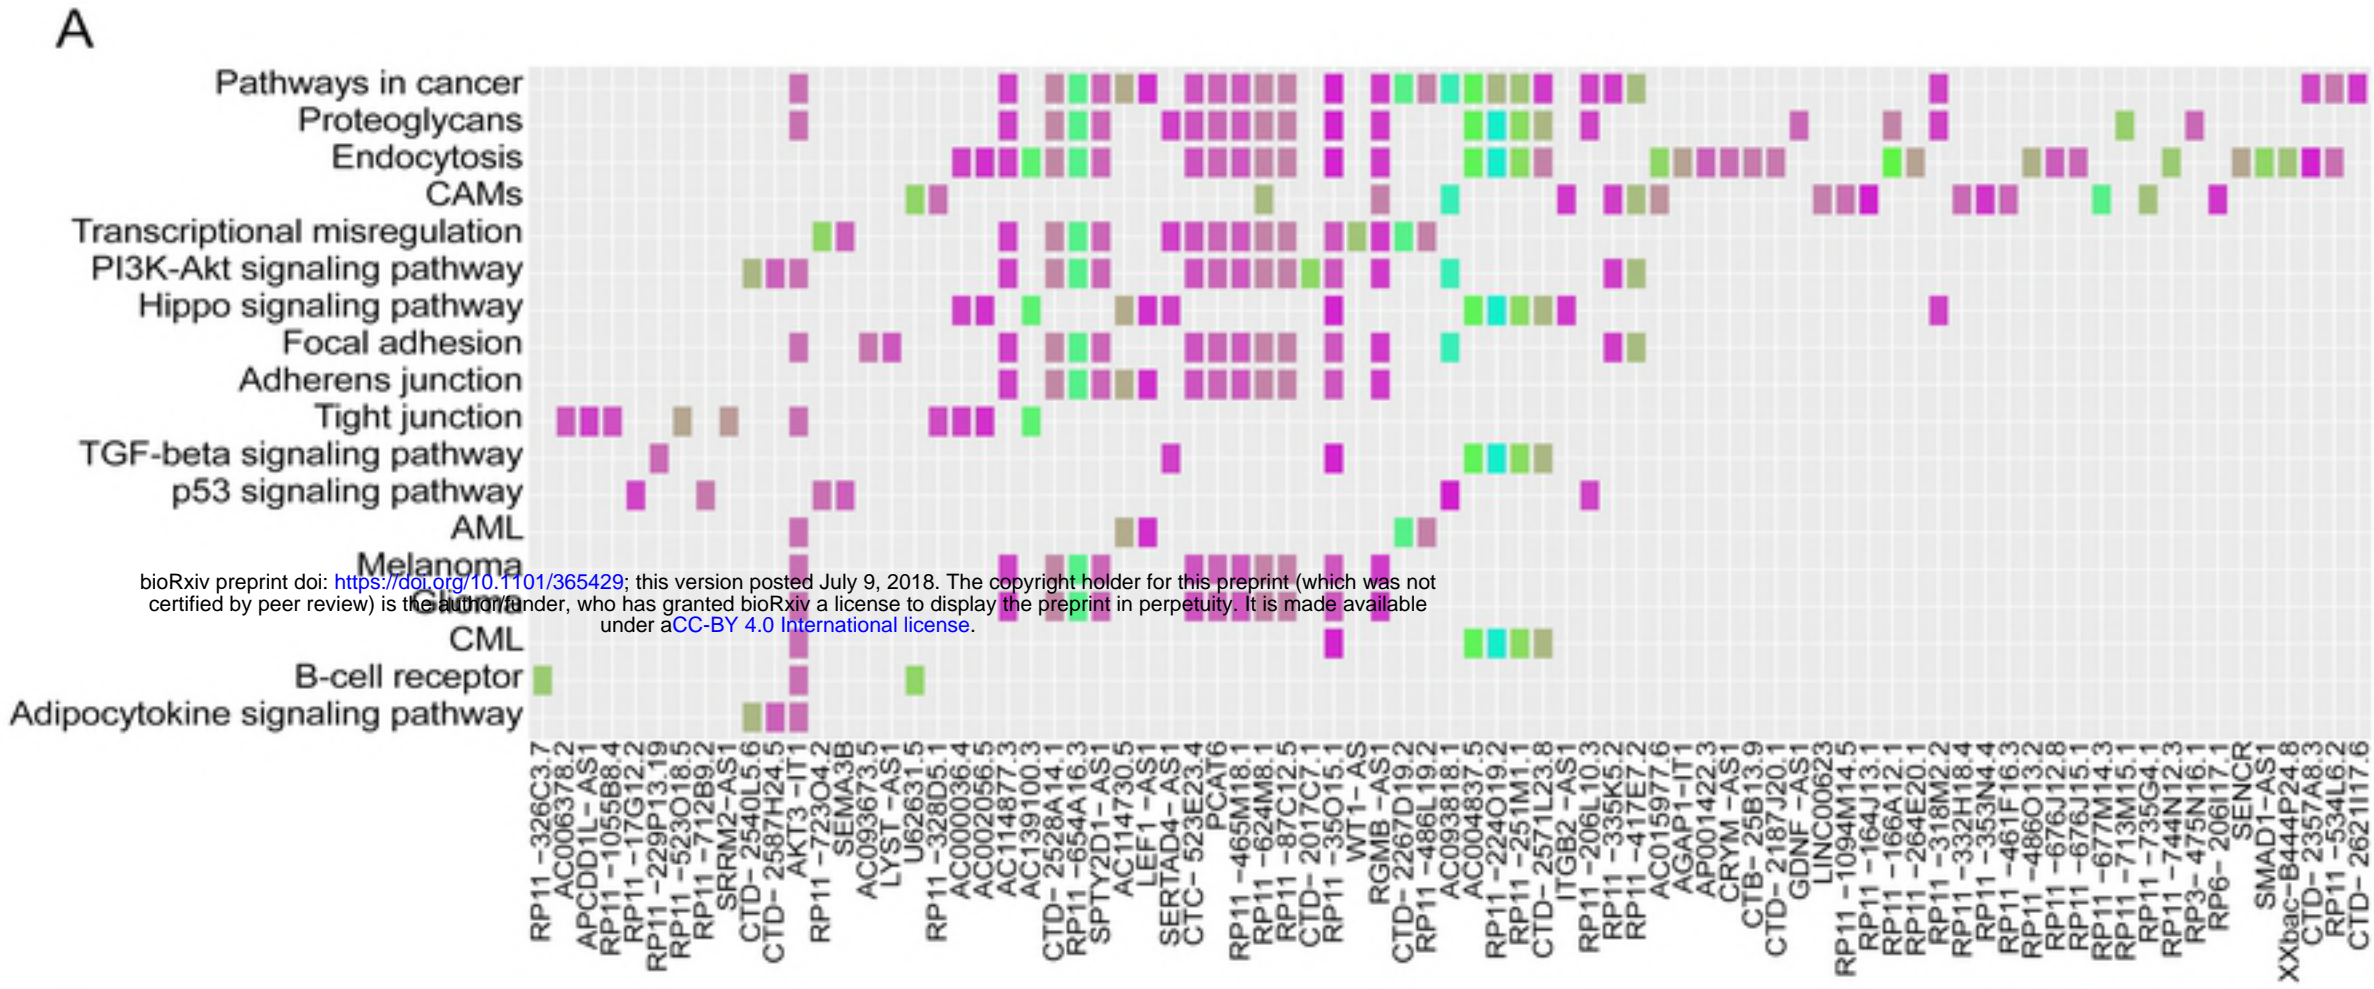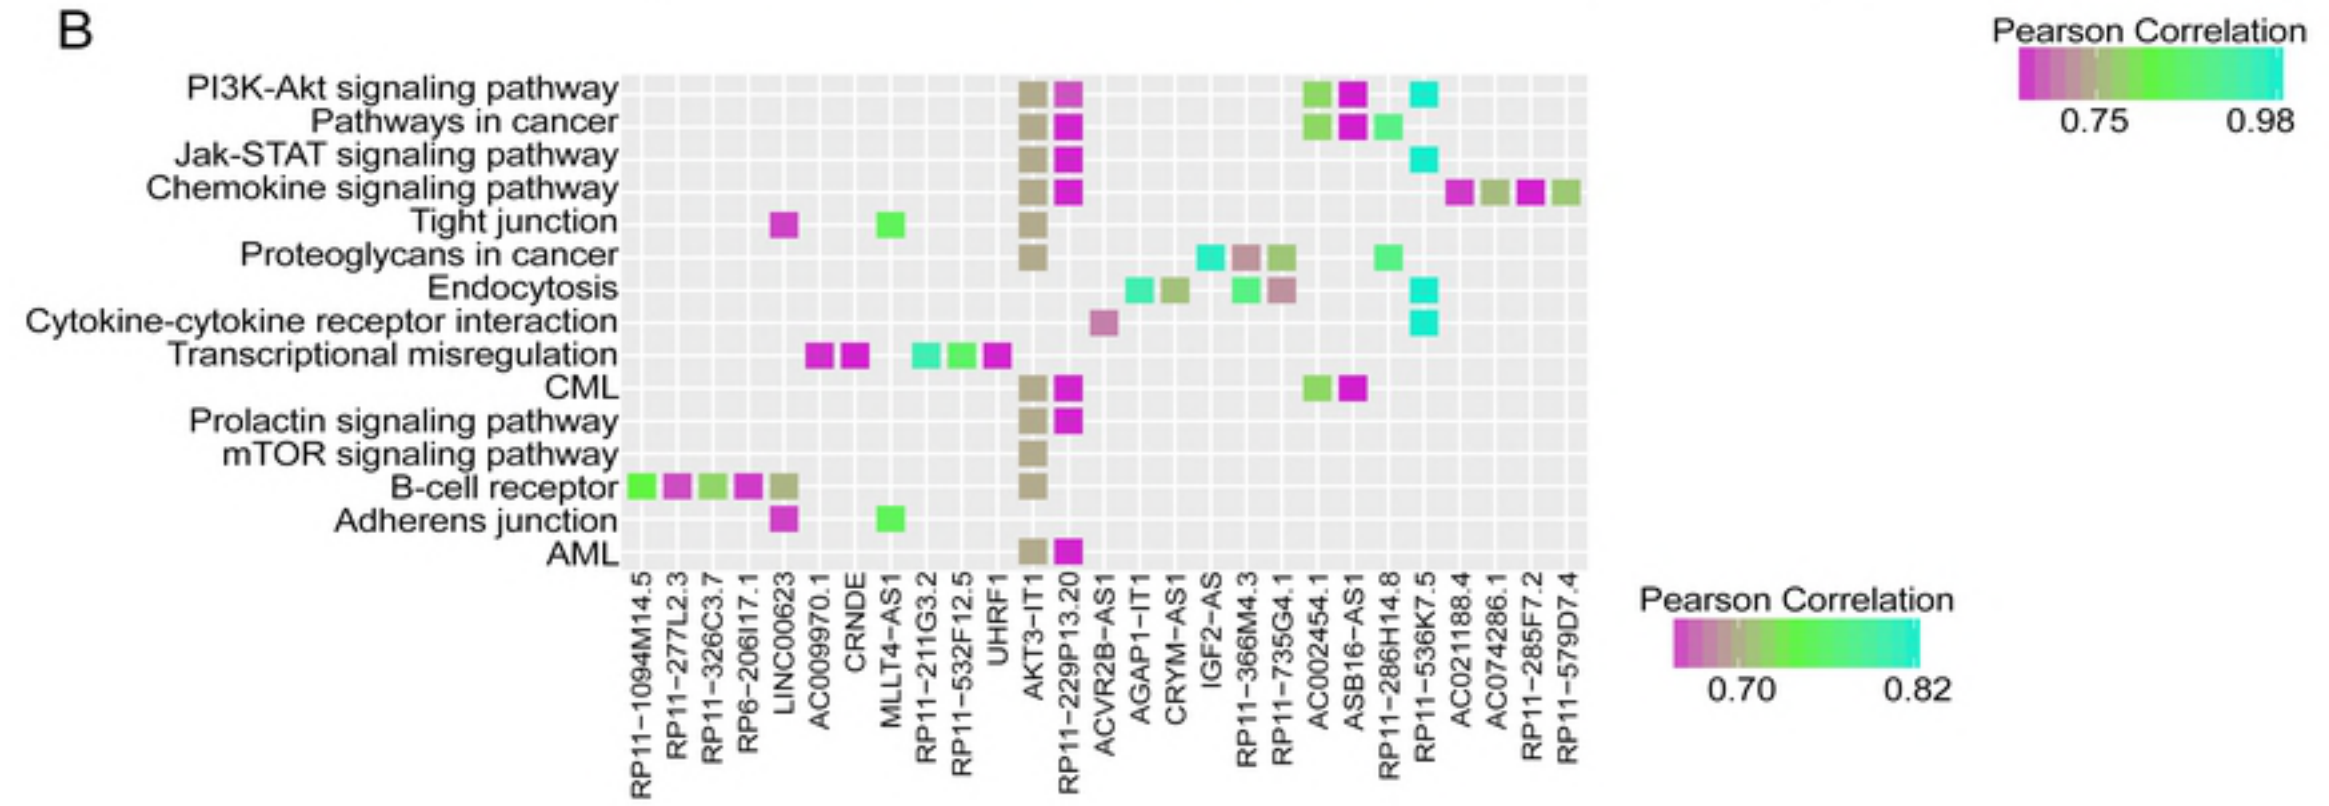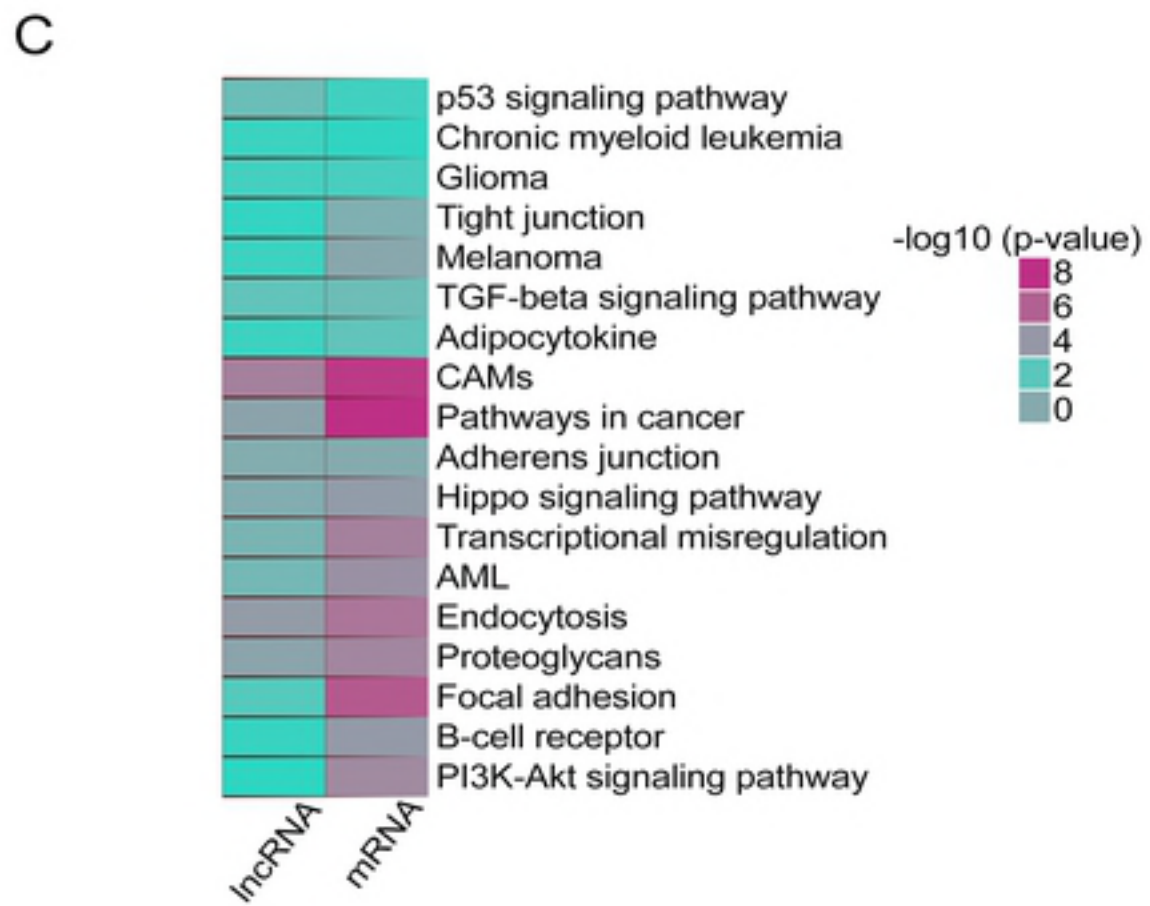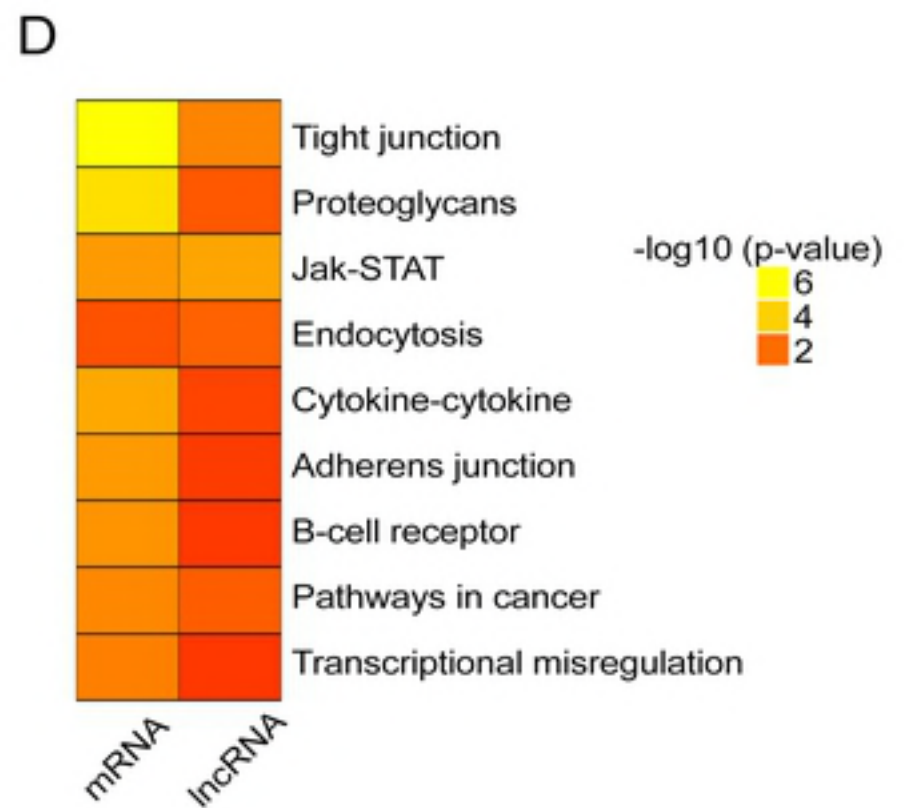



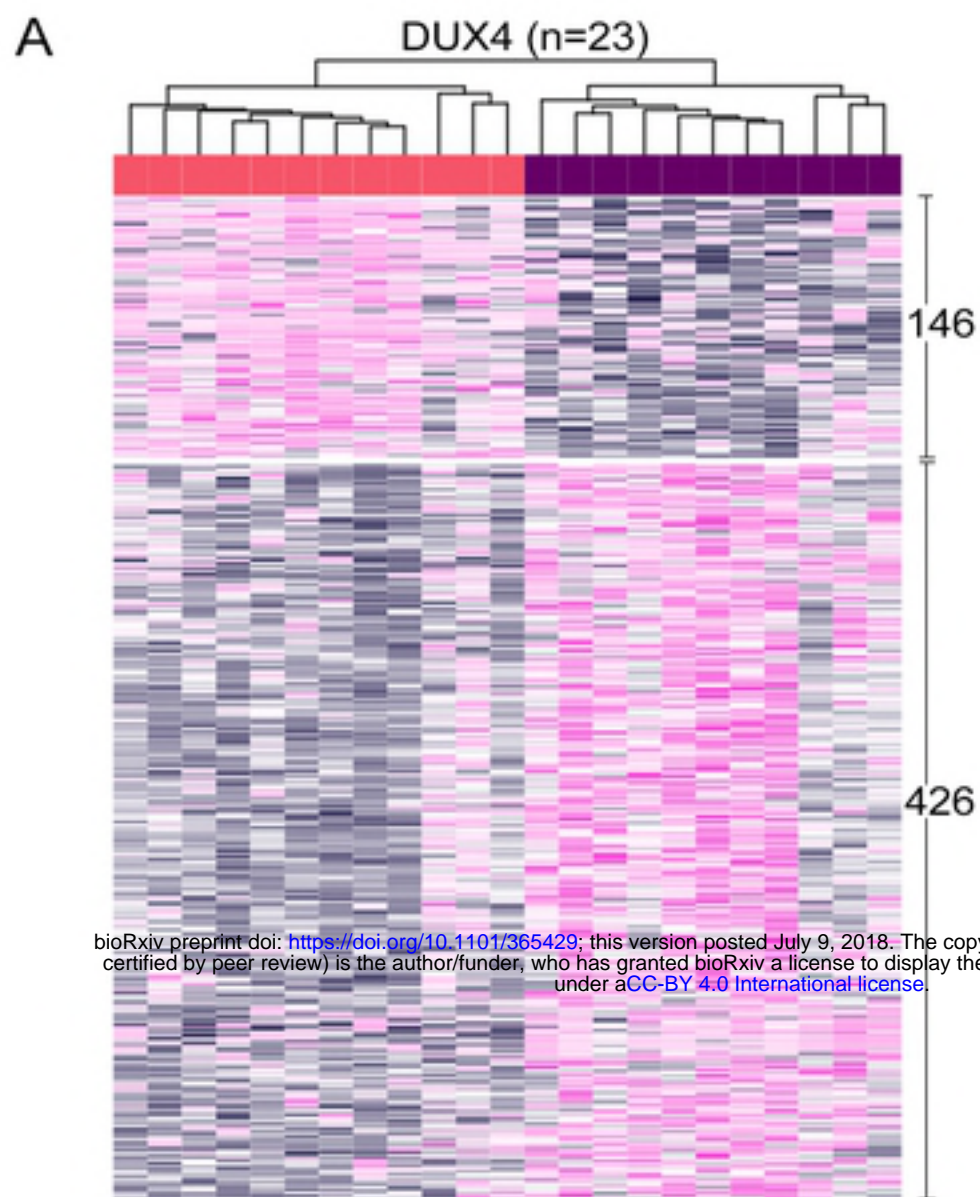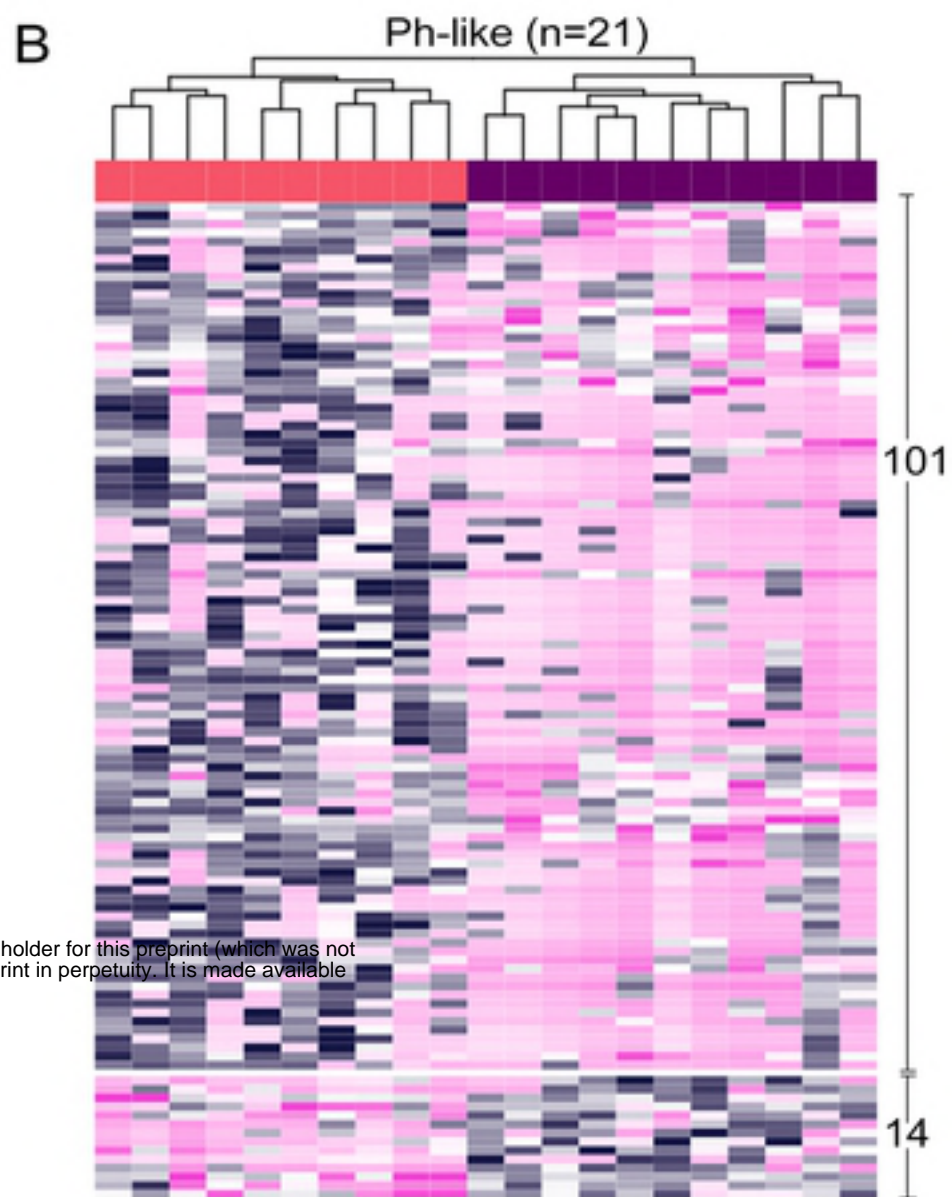

bioRxiv preprint doi: <https://doi.org/10.1101/365429>; this version posted July 9, 2018. The copyright holder for this preprint (which was not certified by peer review) is the author/funder, who has granted bioRxiv a license to display the preprint in perpetuity. It is made available under aCC-BY 4.0 International license.

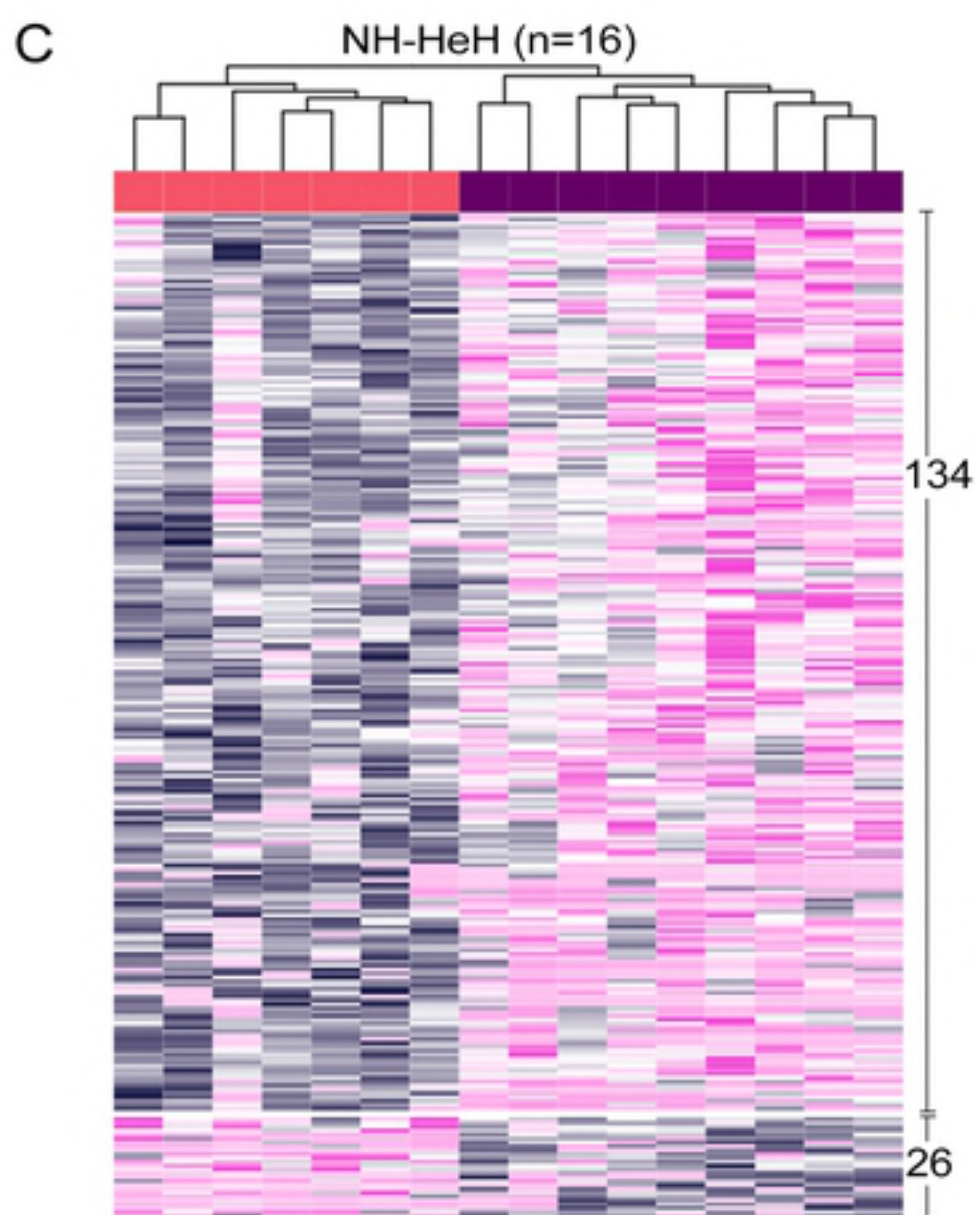

Number of ID and REL samples in each BCP-ALL subtype

| Ph-like    | DUX4       | NH-HeH    |
|------------|------------|-----------|
| ID (n=10)  | ID (n=12)  | ID (n=7)  |
| REL (n=11) | REL (n=11) | REL (n=9) |

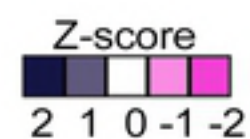

**D**

Pathways enriched based on relapse specific DUX4 lncRNAs

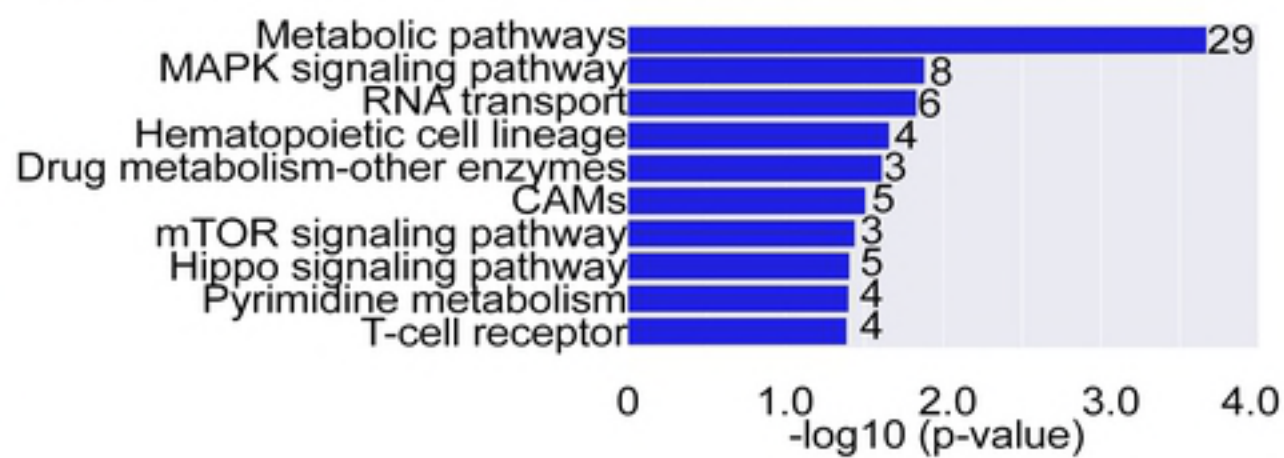

**E** Relapse-specific lncRNAs (867) Subtype-specific lncRNAs (1235)

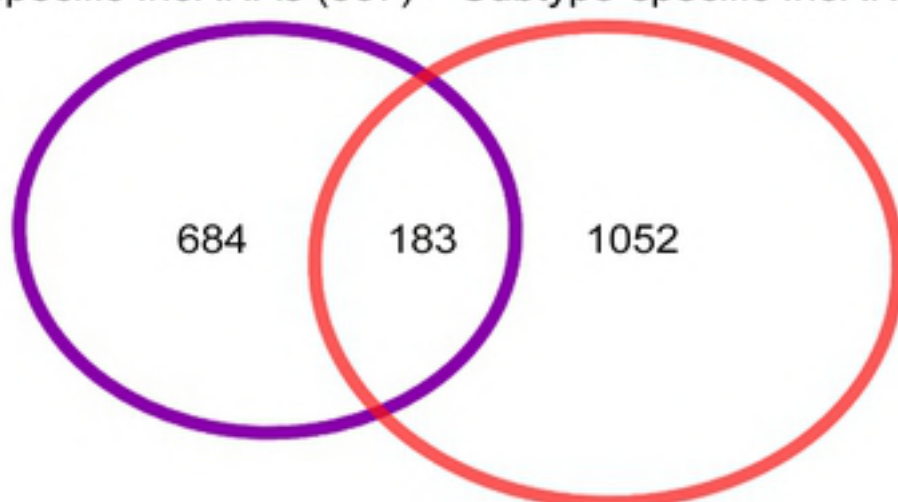



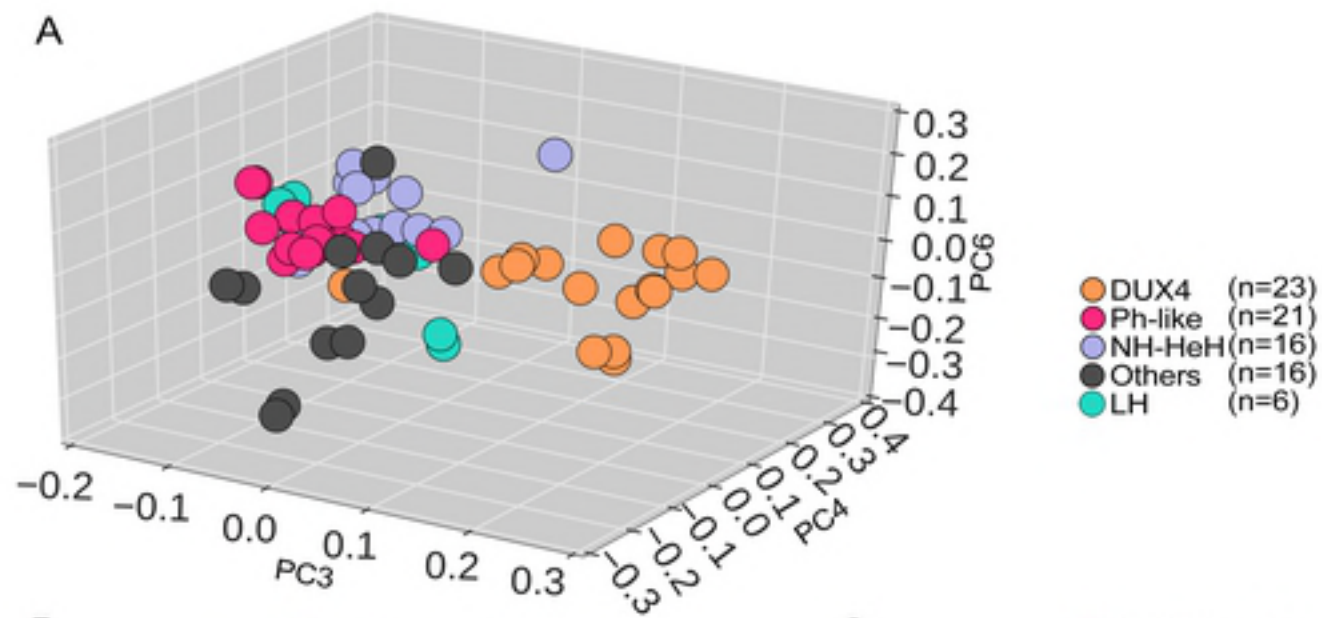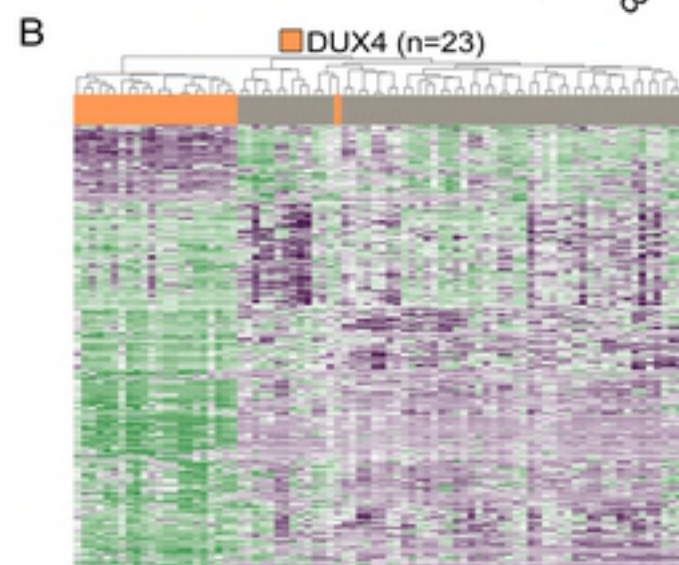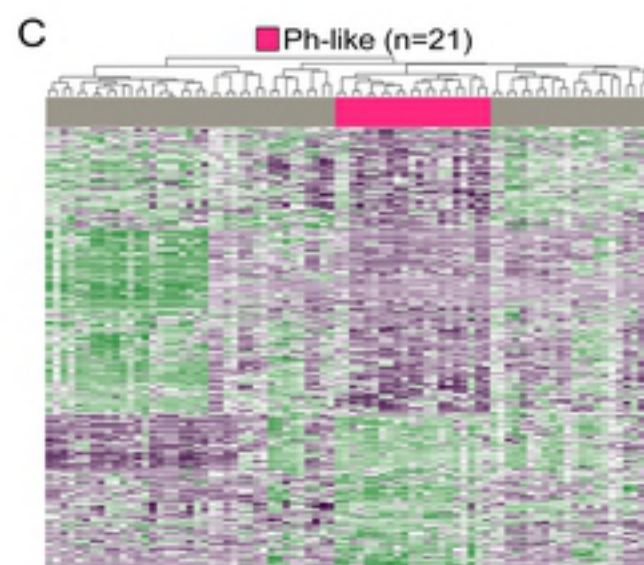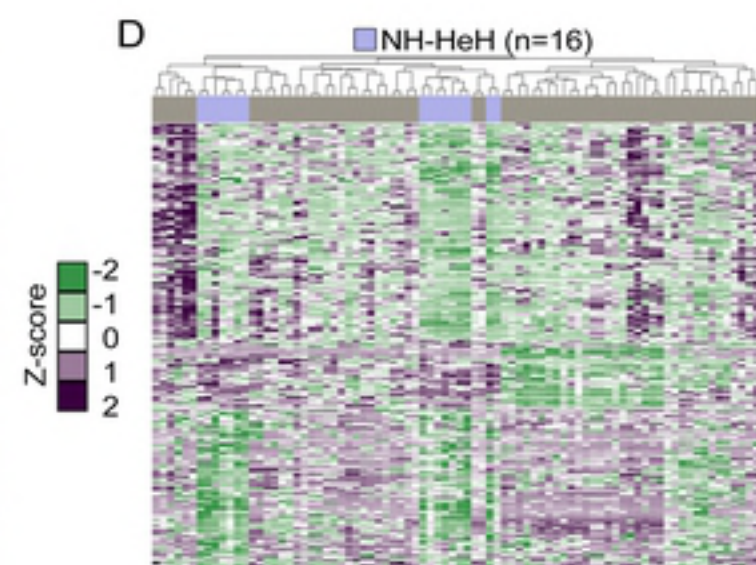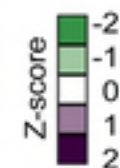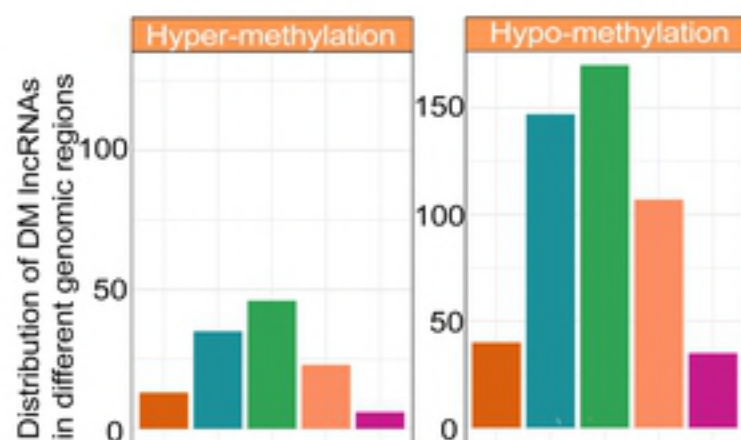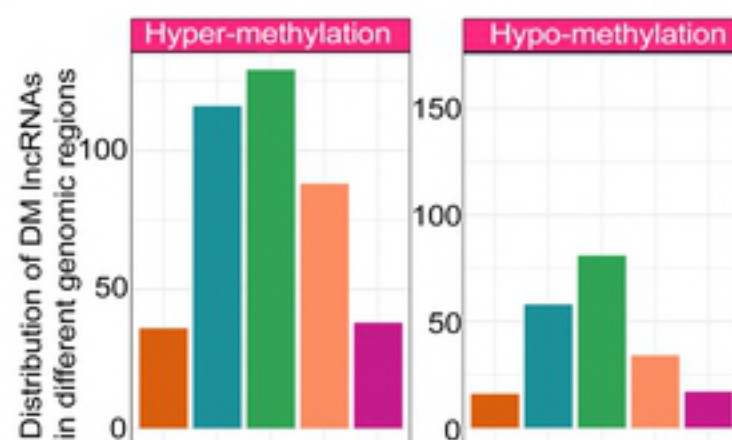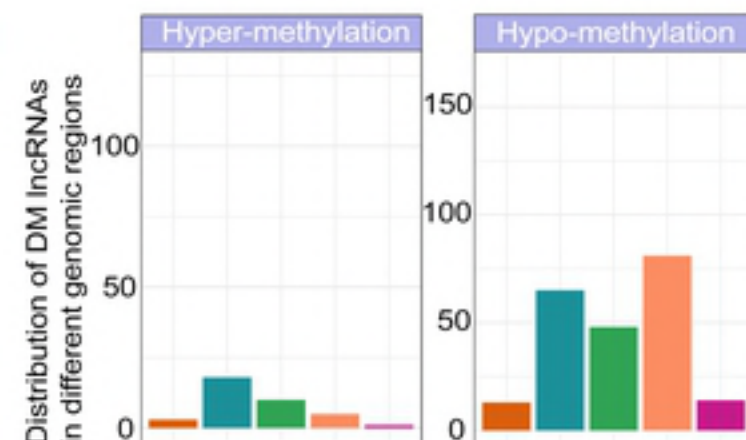

Exon Intergenic Intron Promoter-TSS TTS

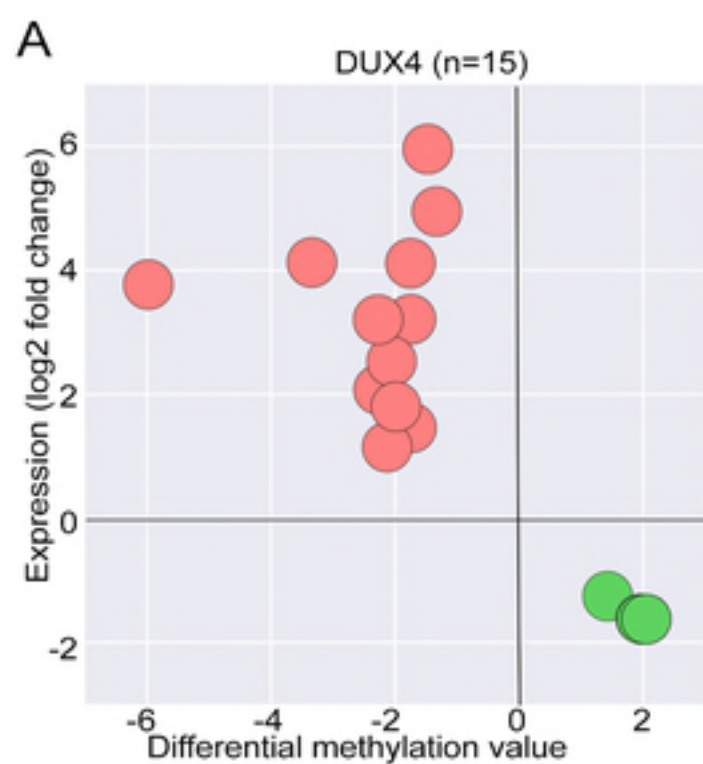

● Hypermethylation & downregulation in subtypes

● Hypomethylation & upregulation in subtypes

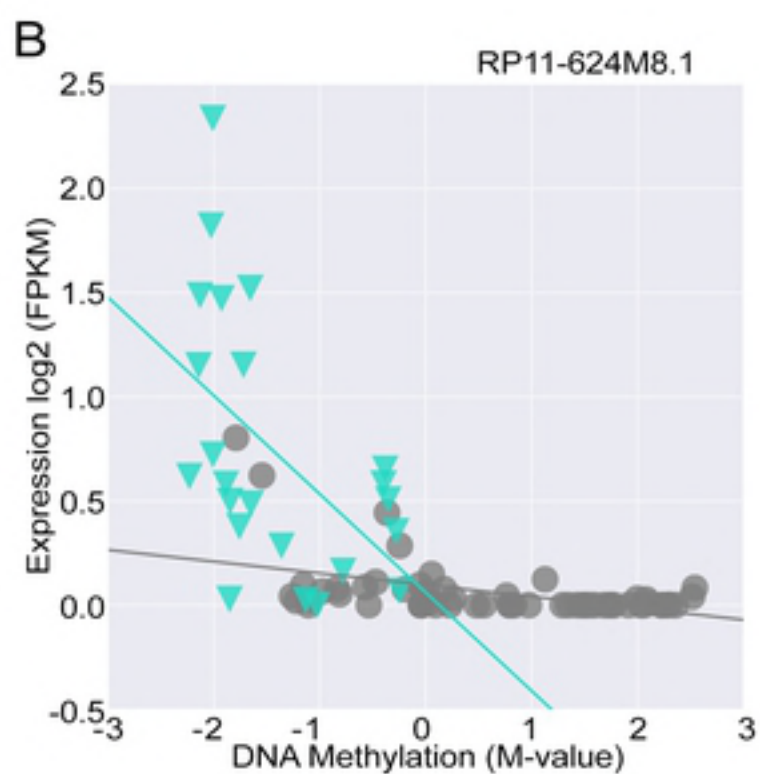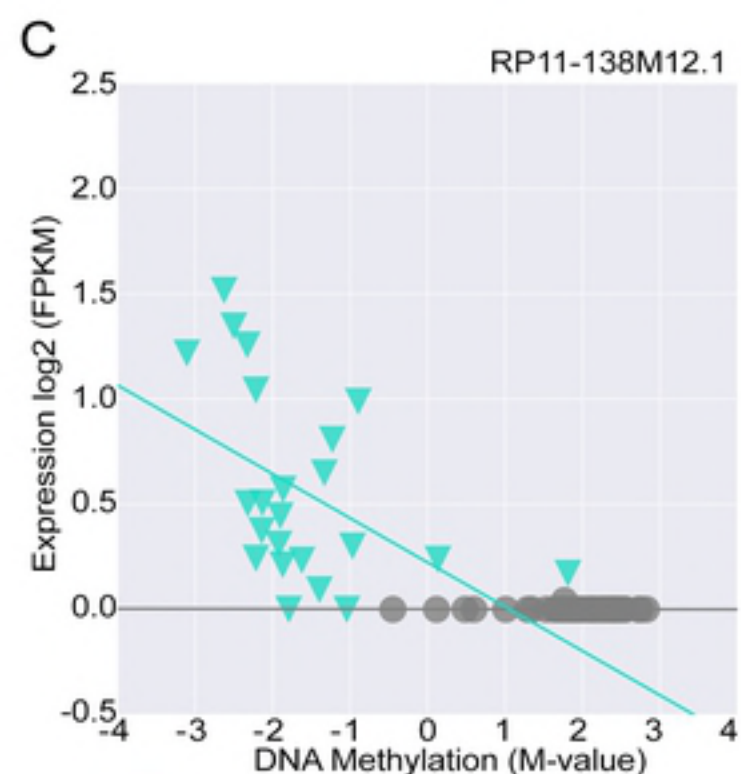

▼ DUX4 (n=23) ● Others (n=59)

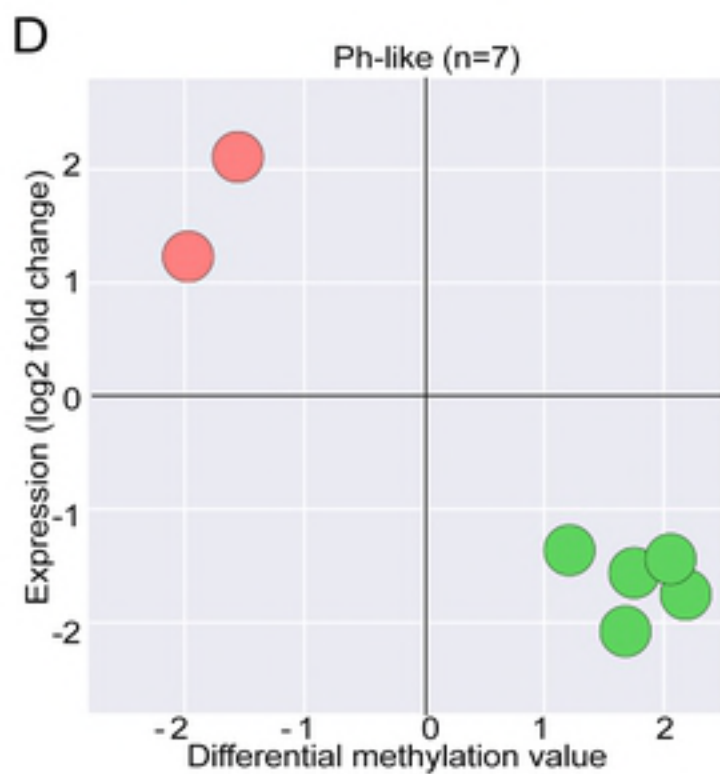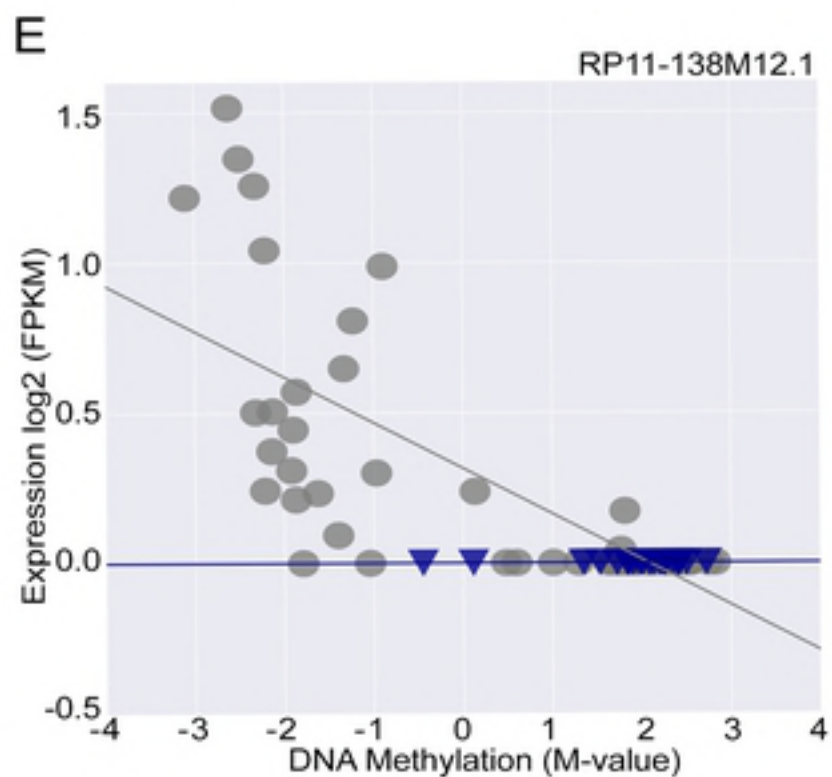

▼ Ph-like (n=21) ● Others (n=61)

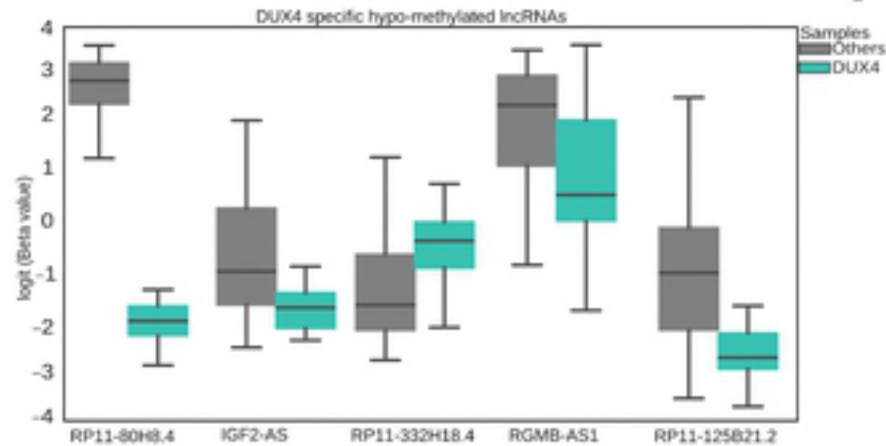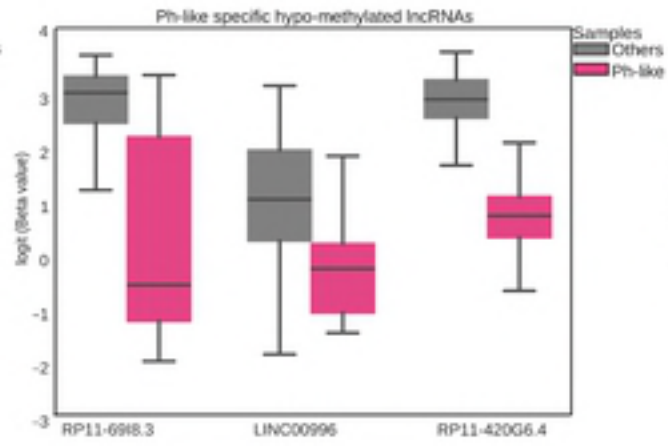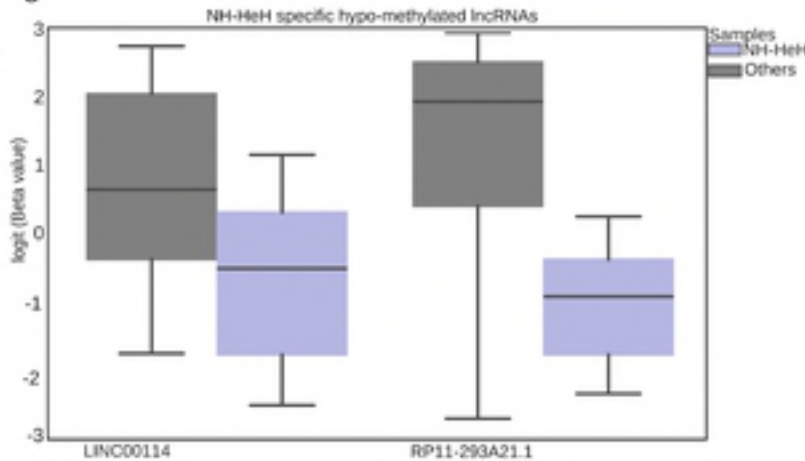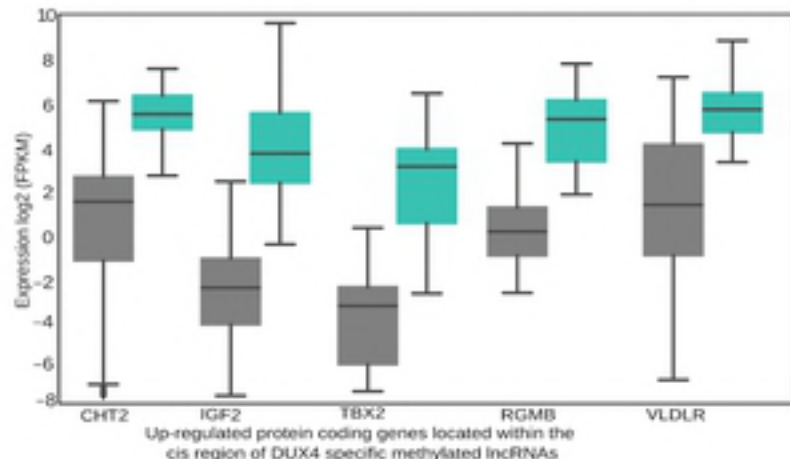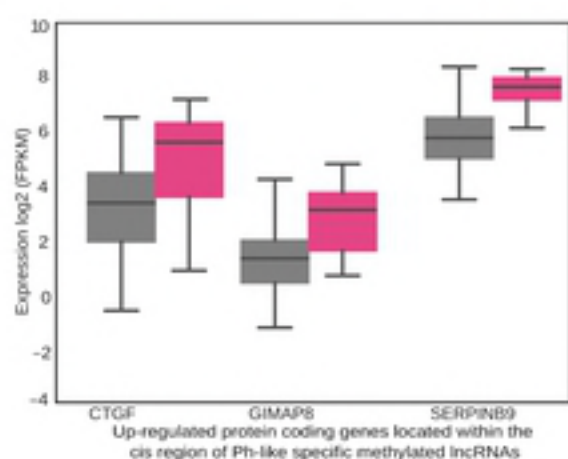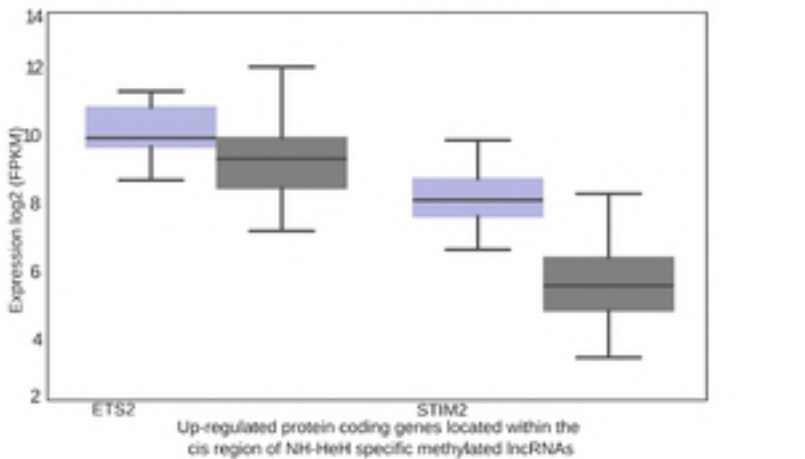

Source: https://www.biorxiv.org/content/early/2018/07/09/365429.full.pdf
